# Supplementary material
Source: ML conference proceedings conference paper supplement (https://proceedings.neurips.cc/paper_files/paper/2023/hash/aaa973f65b98c96e5f850d706464a3c4-Abstract.html)
Supplement: Supplementary file 1 [file aaa973f65b98c96e5f850d706464a3c4-Supplemental-Conference.pdf]

---

## **Appendix for "Fine-Grained Theoretical Analysis of Federated Zeroth-Order Optimization"**

---

## A. Notations

The main notations of this paper are summarized in Table 1.

Table 1: Descriptions of the main notations used in this work.

| Notations                                       | Descriptions                                                                                                                                                     |
|-------------------------------------------------|------------------------------------------------------------------------------------------------------------------------------------------------------------------|
| $N, n$                                          | the total number of clients and the total sample number of each client                                                                                           |
| $S, S_i$                                        | the total dataset and the $i$ -th local dataset, $i = 1, \dots, N$                                                                                               |
| $S_i^{(j)}$                                     | the $i$ -th client's dataset where the $j$ -th sample $z_{ij}$ is replaced by $z'_{ij}$ ,<br>$S^{(j)} = \{S_1, \dots, S_{i-1}, S_i^{(j)}, S_{i+1}, \dots, S_N\}$ |
| $\mathcal{M}_t, M$                              | the collection of selected client indices in the $t$ -th iteration and its size                                                                                  |
| $z_{ij}$                                        | the $j$ -th sample in $S_i$ over distribution $\mathcal{D}_i$ , $j = 1, \dots, n$                                                                                |
| $\mathcal{D}_i$                                 | the distribution of $z_{ij}$ ( $\mathcal{D}_i$ is independent of $\mathcal{D}_{i'}$ if $i \neq i'$ )                                                             |
| $w^t, w_i^t$                                    | the training parameters for the global model and the $i$ -th local model in the $t$ -th iteration respectively                                                   |
| $\mathcal{W}, d$                                | the hypothesis function space and its dimension                                                                                                                  |
| $F(w), F_i(w_i)$                                | the expected risks for the global model and the local model of the $i$ -th client                                                                                |
| $F_S(w), F_{S_i}(w_i)$                          | the empirical risks for the global model and the local model of the $i$ -th client                                                                               |
| $f_i(w_i; z_i), \nabla f_i, \tilde{\nabla} f_i$ | the loss function of the $i$ -th local client over sample $z_i$ , its first-order gradient and the corresponding estimation                                      |
| $\eta_t, \mu$                                   | the step sizes in the $t$ -th iteration and the positive step size in the definition of the derivative                                                           |
| $b_1, b_2$                                      | the sizes of i.i.d. random samples and random direction vectors                                                                                                  |
| $v_{i,l}^t$                                     | the $l$ -th random direction vector for the $i$ -th client in the $t$ -th iteration                                                                              |
| $w^*, w(S)$                                     | the expected optimal model and the empirical optimal model                                                                                                       |
| $T$                                             | the total number of iterations                                                                                                                                   |
| $A, A(S) = w^T$                                 | the federated learning algorithm and the parameter trained with $A$ on $S$                                                                                       |
| $\epsilon$                                      | the parameter of $\ell_1$ on-average model stability                                                                                                             |
| $\ \cdot\ $                                     | the Euclidean norm                                                                                                                                               |
| $\theta, K$                                     | the parameters related to sub-Weibull distribution                                                                                                               |
| $L, \beta, \alpha$                              | the parameters of Lipschitz, smoothness and PL condition respectively                                                                                            |
| $t - t_i, t_0$                                  | the delay of the $i$ -th client in the $t$ -th iteration and the maximum delay                                                                                   |
| $\Gamma(x)$                                     | $\Gamma(x) = \int_0^\infty t^{x-1} e^{-t} dt$                                                                                                                    |

## B. Proofs of Main Results

We first introduce the lemmas which will be used in our proofs.

### B.1. Lemmas

**Lemma 1.** *If the function  $f$  is  $\beta$ -smooth, then we have for any  $z, \bar{z}$ ,*

$$f(w; z, \bar{z}) - f(\bar{w}; z, \bar{z}) \leq \langle w - \bar{w}, \nabla f(\bar{w}; z, \bar{z}) \rangle + \frac{1}{2} \beta \|w - \bar{w}\|^2 \quad (1)$$

and

$$\frac{1}{2\beta} \|\nabla f(w; z, \bar{z})\|^2 \leq f(w; z, \bar{z}) - \inf_{\bar{w}} f(\bar{w}; z, \bar{z}) \leq f(w; z, \bar{z}). \quad (2)$$

**Lemma 2.** [1]. Assume  $X$  is  $K$ -sub-Weibull( $\theta$ ), i.e.  $X \sim \text{subW}(\theta, K)$ , then  $\|X\|_p \leq (2\theta)^\theta K p^\theta$ , where  $p \geq 1/\theta$ . In particular,  $\|X\|_2 \leq (4\theta)^\theta K, \theta \geq 1/2$ .

**Lemma 3.** [2]. Let  $e$  be the base of the natural logarithm. The following inequalities hold:

(a) if  $\alpha = 1$ , then  $\sum_{k=1}^t k^{-\alpha} \leq \log(et)$ ; (b) if  $\alpha > 1$ , then  $\sum_{k=1}^t k^{-\alpha} \leq \frac{\alpha}{\alpha-1}$ .

**Lemma 4.** [3]. Assume a random vector  $X \in \mathbb{R}^d$  is  $d$ -dimensional uniform distribution. For any  $k \in \mathbb{N}$ , there holds  $\mathbb{E}[\|X\|^k] = d/(d+k)$ .

**Lemma 5.** [3]. Let  $v_l \in \mathbb{R}^d, l \in \{1, 2, \dots, b_2\}$  be i.i.d. random vectors satisfying  $d$ -dimensional uniform distribution. For every random vector  $u \in \mathbb{R}^d$  independent of all  $v_l$ , the following inequality holds

$$\mathbb{E} \left[ \left\| \frac{1}{b_2} \sum_{l=1}^{b_2} \langle u, v_l \rangle v_l - u \right\| \right] \leq \sqrt{\frac{d}{b_2}} \|u\|.$$

## B.2. Proof of Theorem 1

**Proof of Theorem 1:** (a) According to the symmetry, triangular inequality,  $L$ -Lipschitz continuity and  $\ell_1$  on-average model stability, we deduce that

$$\begin{aligned} & |\mathbb{E}[F(A(S)) - F_S(A(S))]| \\ &= \left| \frac{1}{N} \sum_{i=1}^N \mathbb{E}[F_i(A(S)) - F_{S_i}(A(S))] \right| \\ &\leq \frac{1}{N} \sum_{i=1}^n |\mathbb{E}[F_i(A(S)) - F_{S_i}(A(S))]| \\ &= \frac{1}{N} \sum_{i=1}^N \left| \mathbb{E} \left[ F_i(A(S)) - \frac{1}{n} \sum_{j=1}^n f_i(A(S); z_{ij}) \right] \right| \\ &= \frac{1}{N} \sum_{i=1}^N \left| \frac{1}{n} \sum_{j=1}^n \mathbb{E} \left[ f_i(A(S^{(j_i)}); z_{ij}) - f_i(A(S); z_{ij}) \right] \right| \\ &\leq \frac{1}{nN} \sum_{i=1}^N \sum_{j=1}^n \mathbb{E} \left[ \left| f_i(A(S^{(j_i)}); z_{ij}) - f_i(A(S); z_{ij}) \right| \right] \\ &\leq \frac{L}{nN} \sum_{i=1}^N \sum_{j=1}^n \mathbb{E} \left[ \left\| A(S^{(j_i)}) - A(S) \right\| \right] \\ &\leq L\epsilon. \end{aligned}$$

This proves Part (a).

(b) Let  $g(w) = f(w) - F_S(w)$ . From Lemma 2 and Assumption 1(a), it is obvious that, for any  $w, w' \in \mathcal{W}, w \neq w'$ ,

$$\|\nabla g(w)\| \leq (4\theta)^\theta K,$$

which means

$$|f(w) - F_S(w) - (f(w') - F_{S'}(w'))| \leq (4\theta)^\theta K \|w - w'\|.$$

Taking expectation with respect to (w.r.t.) all randomness, we get that

$$\mathbb{E}[|f(w) - F_S(w) - (f(w') - F_{S'}(w'))|] \leq (4\theta)^\theta K \mathbb{E}[\|w - w'\|]. \quad (3)$$

Then,

$$|\mathbb{E}[F(A(S)) - F_S(A(S))]|$$

$$\begin{aligned}
&\leq \frac{1}{N} \sum_{i=1}^N |\mathbb{E}[F_i(A(S)) - F_{S_i}(A(S))]| \\
&\leq \frac{1}{nN} \sum_{i=1}^N \sum_{j=1}^n \mathbb{E} \left[ \left| f_i(A(S^{(j_i)}); z_{ij}) - f_i(A(S); z_{ij}) \right| \right] \\
&\leq \frac{1}{nN} \sum_{i=1}^N \sum_{j=1}^n \left( \mathbb{E} \left[ \left| f_i(A(S^{(j_i)}); z_{ij}) - F_{S^{(j_i)}}(A(S^{(j_i)})) - f_i(A(S); z_{ij}) + F_S(A(S)) \right| \right] \right. \\
&\quad \left. + \mathbb{E} \left[ \left| F_{S^{(j_i)}}(A(S^{(j_i)})) - F_S(A(S)) \right| \right] \right) \\
&\leq \frac{(4\theta)^\theta K}{nN} \sum_{i=1}^N \sum_{j=1}^n \mathbb{E}[\|A(S^{(j_i)}) - A(S)\|] + 2\mathbb{E}[F_S(A(S))] \\
&\leq (4\theta)^\theta K\epsilon + 2\mathbb{E}[F_S(A(S))],
\end{aligned}$$

where the first three inequalities are caused by the triangular inequality and the fourth inequality is due to Equation (3). The stated result in Part (b) is proved.  $\square$

### B.3. Proof of Theorem 2

**Proof of Theorem 2:** Let  $S^{(j_i)} = S^{(n_N)} = \{S_i\}_{i=1}^{N-1} \cup S_N^{(n)}$ . Define  $\alpha_{ij}^t = |\{m : z_{i,m}^t = z_{ij}^t\}|$ ,  $\forall t \in \mathbb{N}, i \in \mathcal{M}_t, j \in [n], m \in [b_1]$ . That is  $\alpha_{ij}^t$  is the number of samples that are equal to  $z_{ij}$  in the  $t$ -th global iteration for the  $i$ -th edge device. It is obvious that  $\mathbb{E}[\alpha_{ij}^t] = b_1/n, \mathbb{E}[(\alpha_{ij}^t)^2] = (\mathbb{E}[\alpha_{ij}^t])^2 + \text{Var}(\alpha_{ij}^t) = \frac{b_1}{n} (1 + \frac{b_1-1}{n})$ . Then, the update can be reformulated as

$$w^{t+1} = w^t - \frac{\eta_t}{b_1 M} \sum_{i \in \mathcal{M}_t} \sum_{j \in [n]} \alpha_{ij}^t \tilde{\nabla} f_i \left( w_i^t; z_{ij}^t, \{v_{i,l}^t\}_{l=1}^{b_2}, \mu \right). \quad (4)$$

For the sake of simplicity, we denote  $\tilde{\nabla} f_i \left( w_i^t; z_{ij}^t, \{v_{i,l}^t\}_{l=1}^{b_2}, \mu \right)$  as  $\tilde{\nabla} f_i(w_i^t; z_{ij}^t)$ . According to the new formulation, we can get

$$\begin{aligned}
&\|w^{t+1} - \bar{w}^{t+1}\| \\
&= \left\| w^t - \bar{w}^t - \frac{\eta_t}{b_1 M} \sum_{i \in \mathcal{M}_t} \sum_{j \in [n]} \alpha_{ij}^t \left( \tilde{\nabla} f_i(w_i^t; z_{ij}^t) - \tilde{\nabla} f_i(\bar{w}_i^t; \bar{z}_{ij}^t) \right) \right\| \\
&\leq \left\| w^t - \bar{w}^t - \frac{\eta_t}{b_1 M} \sum_{i \in \mathcal{M}_t} \sum_{j \in [n]} \alpha_{ij}^t \left( \nabla f_i(w_i^t; z_{ij}^t) - \nabla f_i(\bar{w}_i^t; \bar{z}_{ij}^t) \right) \right\| \\
&\quad + \left\| \frac{\eta_t}{b_1 M} \sum_{i \in \mathcal{M}_t} \sum_{j \in [n]} \alpha_{ij}^t \left( \tilde{\nabla} f_i(w_i^t; z_{ij}^t) - \tilde{\nabla} f_i(\bar{w}_i^t; \bar{z}_{ij}^t) - \nabla f_i(w_i^t; z_{ij}^t) + \nabla f_i(\bar{w}_i^t; \bar{z}_{ij}^t) \right) \right\|.
\end{aligned} \quad (5)$$

Considering the possibility of choosing a client who has a disturbed sample, we carry out the following discussion. When  $N \notin \mathcal{M}_t$ , we use smoothness, the fact that  $w_i^t = w^t$  to get

$$\begin{aligned}
(5) \quad &\leq \|w^t - \bar{w}^t\| + \frac{\eta_t}{b_1 M} \sum_{i \in \mathcal{M}_t} \sum_{j \in [n]} \alpha_{ij}^t \|\nabla f_i(w_i^t; z_{ij}^t) - \nabla f_i(\bar{w}_i^t; \bar{z}_{ij}^t)\| \\
&\leq \|w^t - \bar{w}^t\| + \frac{\beta \eta_t}{b_1 M} \sum_{i \in \mathcal{M}_t} \sum_{j \in [n]} \alpha_{ij}^t \|w_i^t - \bar{w}_i^t\| \\
&= \|w^t - \bar{w}^t\| + \frac{\beta \eta_t}{b_1 M} \sum_{i \in \mathcal{M}_t} \sum_{j \in [n]} \alpha_{ij}^t \|w^t - \bar{w}^t\|
\end{aligned}$$

$$= \left( 1 + \frac{\beta\eta_t}{b_1M} \sum_{i \in \mathcal{M}_t} \sum_{j \in [n]} \alpha_{ij}^t \right) \|w^t - \bar{w}^t\|,$$

and

$$\begin{aligned}
& (6) \\
& \leq \frac{\eta_t}{b_1M} \sum_{i \in \mathcal{M}_t} \sum_{j \in [n]} \alpha_{ij}^t \left\| \tilde{\nabla} f_i(w_i^t; z_{ij}^t) - \tilde{\nabla} f_i(\bar{w}_i^t; z_{ij}^t) - \nabla f_i(w_i^t; z_{ij}^t) + \nabla f_i(\bar{w}_i^t; z_{ij}^t) \right\| \\
& = \frac{\eta_t}{b_1M} \sum_{i \in \mathcal{M}_t} \sum_{j \in [n]} \alpha_{ij}^t \left\| \frac{1}{b_2} \sum_{l=1}^{b_2} \left( \langle \nabla f_i(w_i^t; z_{ij}^t) - \nabla f_i(\bar{w}_i^t; z_{ij}^t), v_{i,l}^t \rangle v_{i,l}^t \right. \right. \\
& \quad \left. \left. + \left( \frac{\mu}{2} (v_{i,l}^t)^\top \nabla_{w_i}^2 f_i(w_i; z_{ij}^t) |_{w_i=w_{i,l}^{t*}} v_{i,l}^t \right) v_{i,l}^t - \left( \frac{\mu}{2} (v_{i,l}^t)^\top \nabla_{w_i}^2 f_i(w_i; z_{ij}^t) |_{w_i=w_{i,l}^{t*}} v_{i,l}^t \right) v_{i,l}^t \right. \right. \\
& \quad \left. \left. - \nabla f_i(w_i^t; z_{ij}^t) + \nabla f_i(\bar{w}_i^t; z_{ij}^t) \right) \right\| \\
& = \frac{\eta_t}{b_1M} \sum_{i \in \mathcal{M}_t} \sum_{j \in [n]} \alpha_{ij}^t \left( \left\| \frac{1}{b_2} \sum_{l=1}^{b_2} \left( \left( \frac{\mu}{2} (v_{i,l}^t)^\top \nabla_{w_i}^2 f_i(w_i; z_{ij}^t) |_{w_i=w_{i,l}^{t*}} v_{i,l}^t \right) v_{i,l}^t \right. \right. \right. \\
& \quad \left. \left. - \left( \frac{\mu}{2} (v_{i,l}^t)^\top \nabla_{w_i}^2 f_i(w_i; z_{ij}^t) |_{w_i=w_{i,l}^{t*}} v_{i,l}^t \right) v_{i,l}^t \right) \right\| \\
& \quad \left. + \left\| \frac{1}{b_2} \sum_{l=1}^{b_2} \langle \nabla f_i(w_i^t; z_{ij}^t) - \nabla f_i(\bar{w}_i^t; z_{ij}^t), v_{i,l}^t \rangle v_{i,l}^t - \nabla f_i(w_i^t; z_{ij}^t) + \nabla f_i(\bar{w}_i^t; z_{ij}^t) \right\| \right) \\
& \leq \frac{\eta_t}{b_1M} \sum_{i \in \mathcal{M}_t} \sum_{j \in [n]} \alpha_{ij}^t \left( \frac{2}{b_2} \sum_{l=1}^{b_2} \frac{\mu\beta}{2} \|v_{i,l}^t\|^3 \right. \\
& \quad \left. + \left\| \frac{1}{b_2} \sum_{l=1}^{b_2} \langle \nabla f_i(w_i^t; z_{ij}^t) - \nabla f_i(\bar{w}_i^t; z_{ij}^t), v_{i,l}^t \rangle v_{i,l}^t - \nabla f_i(w_i^t; z_{ij}^t) + \nabla f_i(\bar{w}_i^t; z_{ij}^t) \right\| \right) \\
& \leq \frac{\eta_t}{b_1M} \sum_{i \in \mathcal{M}_t} \sum_{j \in [n]} \alpha_{ij}^t \left( \frac{\mu\beta}{b_2} \sum_{l=1}^{b_2} \|v_{i,l}^t\|^3 \right. \\
& \quad \left. + \left\| \frac{1}{b_2} \sum_{l=1}^{b_2} \langle \nabla f_i(w_i^t; z_{ij}^t) - \nabla f_i(\bar{w}_i^t; z_{ij}^t), v_{i,l}^t \rangle v_{i,l}^t - \nabla f_i(w_i^t; z_{ij}^t) + \nabla f_i(\bar{w}_i^t; z_{ij}^t) \right\| \right).
\end{aligned}$$

When  $N \in \mathcal{M}_t$ , let  $P_t = \{(i, j) | i \in \mathcal{M}_t / \{N\}, j \in [n] \text{ or } i = N, j \in [n-1]\}$ , then

$$\begin{aligned}
& (5) \\
& \leq \|w^t - \bar{w}^t\| + \frac{\eta_t}{b_1M} \sum_{P_t} \alpha_{ij}^t \|\nabla f_i(w_i^t; z_{ij}^t) - \nabla f_i(\bar{w}_i^t; z_{ij}^t)\| \\
& \quad + \frac{\eta_t}{b_1M} \alpha_{Nn}^t \|\nabla f_N(w_N^t; z_{Nn}^t) - \nabla f_N(\bar{w}_N^t; \bar{z}_{Nn}^t)\| \\
& \leq \|w^t - \bar{w}^t\| + \frac{\beta\eta_t}{b_1M} \sum_{P_t} \alpha_{ij}^t \|w^t - \bar{w}^t\| + \frac{2\eta_t L}{b_1M} \alpha_{Nn}^t \\
& = \left( 1 + \frac{\beta\eta_t}{b_1M} \sum_{P_t} \alpha_{ij}^t \right) \|w^t - \bar{w}^t\| + \frac{2\eta_t L}{b_1M} \alpha_{Nn}^t,
\end{aligned}$$

and

(6)

$$\begin{aligned}
&\leq \frac{\eta_t}{b_1 M} \sum_{P_i} \alpha_{ij}^t \left\| \tilde{\nabla} f_i(w_i^t; z_{ij}^t) - \tilde{\nabla} f_i(\bar{w}_i^t; z_{ij}^t) - \nabla f_i(w_i^t; z_{ij}^t) + \nabla f_i(\bar{w}_i^t; z_{ij}^t) \right\| \\
&\quad + \frac{\eta_t}{b_1 M} \alpha_{Nn}^t \left\| \tilde{\nabla} f_N(w_N^t; z_{Nn}^t) - \tilde{\nabla} f_N(\bar{w}_N^t; \bar{z}_{Nn}^t) - \nabla f_N(w_N^t; z_{Nn}^t) + \nabla f_N(\bar{w}_N^t; \bar{z}_{Nn}^t) \right\| \\
&\leq \frac{\eta_t}{b_1 M} \sum_{i \in \mathcal{M}_t} \sum_{j \in [n]} \alpha_{ij}^t \frac{\mu\beta}{b_2} \sum_{l=1}^{b_2} \|v_{i,l}^t\|^3 \\
&\quad + \frac{\eta_t}{b_1 M} \sum_{P_i} \alpha_{ij}^t \left\| \frac{1}{b_2} \sum_{l=1}^{b_2} \langle \nabla f_i(w_i^t; z_{ij}^t) - \nabla f_i(\bar{w}_i^t; z_{ij}^t), v_{i,l}^t \rangle v_{i,l}^t - \nabla f_i(w_i^t; z_{ij}^t) + \nabla f_i(\bar{w}_i^t; z_{ij}^t) \right\| \\
&\quad + \frac{\eta_t}{b_1 M} \alpha_{Nn}^t \left\| \frac{1}{b_2} \sum_{l=1}^{b_2} \langle \nabla f_N(w_N^t; z_{Nn}^t) - \nabla f_N(\bar{w}_N^t; \bar{z}_{Nn}^t), v_{N,l}^t \rangle v_{N,l}^t - \nabla f_N(w_N^t; z_{Nn}^t) + \nabla f_N(\bar{w}_N^t; \bar{z}_{Nn}^t) \right\|.
\end{aligned}$$

Then, combining the above four inequalities, we obtain that

$$\begin{aligned}
&\|w^{t+1} - \bar{w}^{t+1}\| \\
&\leq \frac{N-M}{N} \left( \left( 1 + \frac{\beta\eta_t}{b_1 M} \sum_{i \in \mathcal{M}_t} \sum_{j \in [n]} \alpha_{ij}^t \right) \|w^t - \bar{w}^t\| + \frac{\eta_t}{b_1 M} \sum_{i \in \mathcal{M}_t} \sum_{j \in [n]} \alpha_{ij}^t \left( \frac{\mu\beta}{b_2} \sum_{l=1}^{b_2} \|v_{i,l}^t\|^3 \right. \right. \\
&\quad \left. \left. + \left\| \frac{1}{b_2} \sum_{l=1}^{b_2} \langle \nabla f_i(w_i^t; z_{ij}^t) - \nabla f_i(\bar{w}_i^t; z_{ij}^t), v_{i,l}^t \rangle v_{i,l}^t - \nabla f_i(w_i^t; z_{ij}^t) + \nabla f_i(\bar{w}_i^t; z_{ij}^t) \right\| \right) \right) \\
&\quad + \frac{M}{N} \left( \left( 1 + \frac{\beta\eta_t}{b_1 M} \sum_{P_t} \alpha_{ij}^t \right) \|w^t - \bar{w}^t\| + \frac{2\eta_t L}{b_1 M} \alpha_{Nn}^t + \frac{\eta_t}{b_1 M} \sum_{i \in \mathcal{M}_t} \sum_{j \in [n]} \alpha_{ij}^t \frac{\mu\beta}{b_2} \sum_{l=1}^{b_2} \|v_{i,l}^t\|^3 \right. \\
&\quad \left. + \frac{\eta_t}{b_1 M} \sum_{P_i} \alpha_{ij}^t \left\| \frac{1}{b_2} \sum_{l=1}^{b_2} \langle \nabla f_i(w_i^t; z_{ij}^t) - \nabla f_i(\bar{w}_i^t; z_{ij}^t), v_{i,l}^t \rangle v_{i,l}^t - \nabla f_i(w_i^t; z_{ij}^t) + \nabla f_i(\bar{w}_i^t; z_{ij}^t) \right\| \right. \\
&\quad \left. + \frac{\eta_t}{b_1 M} \alpha_{Nn}^t \left\| \frac{1}{b_2} \sum_{l=1}^{b_2} \langle \nabla f_N(w_N^t; z_{Nn}^t) - \nabla f_N(\bar{w}_N^t; \bar{z}_{Nn}^t), v_{N,l}^t \rangle v_{N,l}^t - \nabla f_N(w_N^t; z_{Nn}^t) + \nabla f_N(\bar{w}_N^t; \bar{z}_{Nn}^t) \right\| \right).
\end{aligned}$$

Define  $J_i^t = \{z_{i,1}^t, \dots, z_{i,b_1}^t\}$ ,  $t \in \mathbb{N}$ ,  $i \in [N]$ . Taking conditional expectation w.r.t.  $J_i^t$ , we derive

$$\begin{aligned}
&\mathbb{E}_{J_i^t} [\|w^{t+1} - \bar{w}^{t+1}\|] \\
&\leq \frac{N-M}{N} \left( \left( 1 + \frac{\beta\eta_t}{b_1 M} \sum_{i \in \mathcal{M}_t} \sum_{j \in [n]} \mathbb{E}_{J_i^t} [\alpha_{ij}^t] \right) \|w^t - \bar{w}^t\| + \frac{\eta_t}{b_1 M} \sum_{i \in \mathcal{M}_t} \sum_{j \in [n]} \mathbb{E}_{J_i^t} [\alpha_{ij}^t] \left( \frac{\mu\beta}{b_2} \sum_{l=1}^{b_2} \|v_{i,l}^t\|^3 \right. \right. \\
&\quad \left. \left. + \left\| \frac{1}{b_2} \sum_{l=1}^{b_2} \langle \nabla f_i(w_i^t; z_{ij}^t) - \nabla f_i(\bar{w}_i^t; z_{ij}^t), v_{i,l}^t \rangle v_{i,l}^t - \nabla f_i(w_i^t; z_{ij}^t) + \nabla f_i(\bar{w}_i^t; z_{ij}^t) \right\| \right) \right) \\
&\quad + \frac{M}{N} \left( \left( 1 + \frac{\beta\eta_t}{b_1 M} \sum_{P_t} \mathbb{E}_{J_i^t} [\alpha_{ij}^t] \right) \|w^t - \bar{w}^t\| \right. \\
&\quad \left. + \frac{2\eta_t L}{b_1 M} \mathbb{E}_{J_N^t} [\alpha_{Nn}^t] + \frac{\eta_t}{b_1 M} \sum_{i \in \mathcal{M}_t} \sum_{j \in [n]} \mathbb{E}_{J_i^t} [\alpha_{ij}^t] \frac{\mu\beta}{b_2} \sum_{l=1}^{b_2} \|v_{i,l}^t\|^3 \right. \\
&\quad \left. + \frac{\eta_t}{b_1 M} \sum_{P_i} \mathbb{E}_{J_i^t} [\alpha_{ij}^t] \left\| \frac{1}{b_2} \sum_{l=1}^{b_2} \langle \nabla f_i(w_i^t; z_{ij}^t) - \nabla f_i(\bar{w}_i^t; z_{ij}^t), v_{i,l}^t \rangle v_{i,l}^t - \nabla f_i(w_i^t; z_{ij}^t) + \nabla f_i(\bar{w}_i^t; z_{ij}^t) \right\| \right. \\
&\quad \left. + \frac{\eta_t}{b_1 M} \mathbb{E}_{J_N^t} [\alpha_{Nn}^t] \left\| \frac{1}{b_2} \sum_{l=1}^{b_2} \langle \nabla f_N(w_N^t; z_{Nn}^t) - \nabla f_N(\bar{w}_N^t; \bar{z}_{Nn}^t), v_{N,l}^t \rangle v_{N,l}^t - \nabla f_N(w_N^t; z_{Nn}^t) + \nabla f_N(\bar{w}_N^t; \bar{z}_{Nn}^t) \right\| \right)
\end{aligned}$$

$$\begin{aligned}
&= \frac{N-M}{N}(1+\eta_t\beta)\|w^t - \bar{w}^t\| + \frac{M}{N}(1+\eta_t\beta)\|w^t - \bar{w}^t\| + \frac{2\eta_t L}{nN} + \frac{\mu\eta_t\beta}{b_2} \sum_{l=1}^{b_2} \|v_{i,l}^t\|^3 \\
&\quad + \frac{N-M}{N}\eta_t \left\| \frac{1}{b_2} \sum_{l=1}^{b_2} \langle \nabla f_i(w_i^t; z_{ij}^t) - \nabla f_i(\bar{w}_i^t; z_{ij}^t), v_{i,l}^t \rangle v_{i,l}^t - \nabla f_i(w_i^t; z_{ij}^t) + \nabla f_i(\bar{w}_i^t; z_{ij}^t) \right\| \\
&\quad + \frac{M}{N}\eta_t \left\| \frac{1}{b_2} \sum_{l=1}^{b_2} \langle \nabla f_i(w_i^t; z_{ij}^t) - \nabla f_i(\bar{w}_i^t; z_{ij}^t), v_{i,l}^t \rangle v_{i,l}^t - \nabla f_i(w_i^t; z_{ij}^t) + \nabla f_i(\bar{w}_i^t; z_{ij}^t) \right\| \\
&\quad + \frac{\eta_t}{nN} \left\| \frac{1}{b_2} \sum_{l=1}^{b_2} \langle \nabla f_N(w_N^t; z_{Nn}^t) - \nabla f_N(\bar{w}_N^t; \bar{z}_{Nn}^t), v_{N,l}^t \rangle v_{N,l}^t - \nabla f_N(w_N^t; z_{Nn}^t) + \nabla f_N(\bar{w}_N^t; \bar{z}_{Nn}^t) \right\| \\
&\leq (1+\eta_t\beta)\|w^t - \bar{w}^t\| + \frac{2\eta_t L}{nN} + \frac{\mu\eta_t\beta}{b_2} \sum_{l=1}^{b_2} \|v_{i,l}^t\|^3 \\
&\quad + \eta_t \left\| \frac{1}{b_2} \sum_{l=1}^{b_2} \langle \nabla f_i(w_i^t; z_{ij}^t) - \nabla f_i(\bar{w}_i^t; z_{ij}^t), v_{i,l}^t \rangle v_{i,l}^t - \nabla f_i(w_i^t; z_{ij}^t) + \nabla f_i(\bar{w}_i^t; z_{ij}^t) \right\| \\
&\quad + \frac{\eta_t}{nN} \left\| \frac{1}{b_2} \sum_{l=1}^{b_2} \langle \nabla f_N(w_N^t; z_{Nn}^t) - \nabla f_N(\bar{w}_N^t; \bar{z}_{Nn}^t), v_{N,l}^t \rangle v_{N,l}^t - \nabla f_N(w_N^t; z_{Nn}^t) + \nabla f_N(\bar{w}_N^t; \bar{z}_{Nn}^t) \right\|.
\end{aligned}$$

Further taking expectation w.r.t. all randomness and utilizing Lemmas 4, 5, we obtain that

$$\begin{aligned}
&\mathbb{E}[\|w^{t+1} - \bar{w}^{t+1}\|] \\
&\leq (1+\eta_t\beta)\mathbb{E}[\|w^t - \bar{w}^t\|] + \frac{2\eta_t L}{nN} + \mu\eta_t\beta\mathbb{E}[\|v_{i,l}^t\|^3] \\
&\quad + \eta_t \mathbb{E} \left[ \left\| \frac{1}{b_2} \sum_{l=1}^{b_2} \langle \nabla f_i(w_i^t; z_{ij}^t) - \nabla f_i(\bar{w}_i^t; z_{ij}^t), v_{i,l}^t \rangle v_{i,l}^t - \nabla f_i(w_i^t; z_{ij}^t) + \nabla f_i(\bar{w}_i^t; z_{ij}^t) \right\| \right] \\
&\quad + \frac{\eta_t}{nN} \mathbb{E} \left[ \left\| \frac{1}{b_2} \sum_{l=1}^{b_2} \langle \nabla f_N(w_N^t; z_{Nn}^t) - \nabla f_N(\bar{w}_N^t; \bar{z}_{Nn}^t), v_{N,l}^t \rangle v_{N,l}^t - \nabla f_N(w_N^t; z_{Nn}^t) + \nabla f_N(\bar{w}_N^t; \bar{z}_{Nn}^t) \right\| \right] \\
&\leq (1+\eta_t\beta)\mathbb{E}[\|w^t - \bar{w}^t\|] + \frac{2\eta_t L}{nN} + \frac{d\mu\eta_t\beta}{d+3} + \eta_t \sqrt{\frac{d}{b_2}} \mathbb{E}[\|\nabla f_i(w_i^t; z_{ij}^t) - \nabla f_i(\bar{w}_i^t; z_{ij}^t)\|] \\
&\quad + \frac{\eta_t}{nN} \sqrt{\frac{d}{b_2}} \mathbb{E}[\|\nabla f_N(w_N^t; z_{Nn}^t) - \nabla f_N(\bar{w}_N^t; \bar{z}_{Nn}^t)\|] \\
&\leq \left(1 + \left(1 + \sqrt{\frac{d}{b_2}}\right)\eta_t\beta\right) \mathbb{E}[\|w^t - \bar{w}^t\|] + \left(\frac{2L}{nN} + \mu\beta + \frac{2L}{nN} \sqrt{\frac{d}{b_2}}\right) \eta_t.
\end{aligned}$$

Let  $a_1 = \left(1 + \sqrt{\frac{d}{b_2}}\right)\beta$  and  $a_2 = \frac{2L}{nN} + \mu\beta + \frac{2L}{nN} \sqrt{\frac{d}{b_2}}$ . Taking summation from  $t = 1$  to  $T - 1$ , we deduce that

$$\begin{aligned}
&\mathbb{E}[\|w^T - \bar{w}^T\|] \\
&\leq \sum_{t=1}^{T-1} \left( \prod_{s=t+1}^{T-1} (1 + a_1\eta_s) \right) a_2\eta_t \\
&\leq \sum_{t=1}^{T-1} \exp\left(\sum_{s=t+1}^{T-1} a_1\eta_s\right) a_2\eta_t \\
&\leq \sum_{t=1}^{T-1} \exp\left(a_1\eta_1 \sum_{s=1}^{T-1} s^{-1}\right) a_2\eta_t \\
&= \exp\left(a_1\eta_1 \sum_{s=1}^{T-1} s^{-1}\right) a_2\eta_1 \sum_{t=1}^{T-1} t^{-1}
\end{aligned}$$

$$\begin{aligned} &\leq (e(T-1))^{a_1\eta_1} a_2\eta_1 \log(e(T-1)) \\ &\leq \mathcal{O}\left(\left((nN)^{-1}L + \mu\right) T^{\frac{1}{2}} \log T\right), \end{aligned}$$

where the second inequality is derived by  $1+x \leq e^x$  and the fourth inequality follows by Lemma 3 (a).  $\square$

**Proof of Corollary 1:** We integrate Theorem 1 (a) and Theorem 2 to obtain that

$$\begin{aligned} &|\mathbb{E}[F(w^T) - F_S(w^T)]| \\ &\leq \frac{L}{nN} \sum_{i=1}^N \sum_{j=1}^n \mathbb{E}[\|w^T - \bar{w}^T\|] = L\mathbb{E}[\|w^T - \bar{w}^T\|] \\ &\leq \mathcal{O}\left(L\left((nN)^{-1}L + \mu\right) T^{\frac{1}{2}} \log T\right). \end{aligned}$$

The proof is complete.  $\square$

#### B.4. Proofs of Theorem 3 and Theorem 4

**Proof of Theorem 3:** Let  $S^{(j_i)} = S^{(nN)} = \{S_i\}_{i=1}^{N-1} \cup S_N^{(n)}$ . Similar to the proof of Lemma 1, when  $N \notin \mathcal{M}_t$ ,

$$(5) = \left(1 + \frac{\beta\eta_t}{b_1M} \sum_{i \in \mathcal{M}_t} \sum_{j \in [n]} \alpha_{ij}^t\right) \|w^t - \bar{w}^t\|,$$

and

$$(6) \leq \frac{\eta_t}{b_1M} \sum_{i \in \mathcal{M}_t} \sum_{j \in [n]} \alpha_{ij}^t \left( \frac{\mu\beta}{b_2} \sum_{l=1}^{b_2} \|v_{i,l}^t\|^3 + \left\| \frac{1}{b_2} \sum_{l=1}^{b_2} \langle \nabla f_i(w_i^t; z_{ij}^t) - \nabla f_i(\bar{w}_i^t; z_{ij}^t), v_{i,l}^t \rangle v_{i,l}^t - \nabla f_i(w_i^t; z_{ij}^t) + \nabla f_i(\bar{w}_i^t; z_{ij}^t) \right\| \right).$$

When  $N \in \mathcal{M}_t$ , let  $P_t = \{(i, j) | i \in \mathcal{M}_t / \{N\}, j \in [n] \text{ or } i = N, j \in [n-1]\}$ , then

$$(5) = \left(1 + \frac{\beta\eta_t}{b_1M} \sum_{P_t} \alpha_{ij}^t\right) \|w^t - \bar{w}^t\| + \frac{2\eta_t}{b_1M} \alpha_{Nn}^t \|\nabla f_N(w_N^t; z_{Nn}^t)\|,$$

and

$$(6) \leq \frac{\eta_t}{b_1M} \sum_{i \in \mathcal{M}_t} \sum_{j \in [n]} \alpha_{ij}^t \frac{\mu\beta}{b_2} \sum_{l=1}^{b_2} \|v_{i,l}^t\|^3 + \frac{\eta_t}{b_1M} \sum_{P_t} \alpha_{ij}^t \left\| \frac{1}{b_2} \sum_{l=1}^{b_2} \langle \nabla f_i(w_i^t; z_{ij}^t) - \nabla f_i(\bar{w}_i^t; z_{ij}^t), v_{i,l}^t \rangle v_{i,l}^t - \nabla f_i(w_i^t; z_{ij}^t) + \nabla f_i(\bar{w}_i^t; z_{ij}^t) \right\| + \frac{\eta_t}{b_1M} \alpha_{Nn}^t \left\| \frac{1}{b_2} \sum_{l=1}^{b_2} \langle \nabla f_N(w_N^t; z_{Nn}^t) - \nabla f_N(\bar{w}_N^t; z_{Nn}^t), v_{N,l}^t \rangle v_{N,l}^t - \nabla f_N(w_N^t; z_{Nn}^t) + \nabla f_N(\bar{w}_N^t; z_{Nn}^t) \right\|.$$

Then, combining the above four inequalities, we obtain that

$$\begin{aligned} &\|w^{t+1} - \bar{w}^{t+1}\| \\ &\leq \frac{N-M}{N} \left( \left(1 + \frac{\beta\eta_t}{b_1M} \sum_{i \in \mathcal{M}_t} \sum_{j \in [n]} \alpha_{ij}^t\right) \|w^t - \bar{w}^t\| + \frac{\eta_t}{b_1M} \sum_{i \in \mathcal{M}_t} \sum_{j \in [n]} \alpha_{ij}^t \left( \frac{\mu\beta}{b_2} \sum_{l=1}^{b_2} \|v_{i,l}^t\|^3 + \left\| \frac{1}{b_2} \sum_{l=1}^{b_2} \langle \nabla f_i(w_i^t; z_{ij}^t) - \nabla f_i(\bar{w}_i^t; z_{ij}^t), v_{i,l}^t \rangle v_{i,l}^t - \nabla f_i(w_i^t; z_{ij}^t) + \nabla f_i(\bar{w}_i^t; z_{ij}^t) \right\| \right) \right) \end{aligned}$$



$$\begin{aligned}
& + \frac{M}{N} \left( \left( 1 + \frac{\beta\eta_t}{b_1M} \sum_{P_t} \alpha_{ij}^t \right) \|w^t - \bar{w}^t\| + \frac{2\eta_t}{b_1M} \alpha_{Nn}^t \|\nabla f_N(w_N^t; z_{Nn}^t)\| + \frac{\eta_t}{b_1M} \sum_{i \in \mathcal{M}_t} \sum_{j \in [n]} \alpha_{ij}^t \frac{\mu\beta}{b_2} \sum_{l=1}^{b_2} \|v_{i,l}^t\|^3 \right. \\
& + \frac{\eta_t}{b_1M} \sum_{P_t} \alpha_{ij}^t \left\| \frac{1}{b_2} \sum_{l=1}^{b_2} \langle \nabla f_i(w_i^t; z_{ij}^t) - \nabla f_i(\bar{w}_i^t; z_{ij}^t), v_{i,l}^t \rangle v_{i,l}^t - \nabla f_i(w_i^t; z_{ij}^t) + \nabla f_i(\bar{w}_i^t; z_{ij}^t) \right\| \\
& \left. + \frac{\eta_t}{b_1M} \alpha_{Nn}^t \left\| \frac{1}{b_2} \sum_{l=1}^{b_2} \langle \nabla f_N(w_N^t; z_{Nn}^t) - \nabla f_N(\bar{w}_N^t; \bar{z}_{Nn}^t), v_{N,l}^t \rangle v_{N,l}^t - \nabla f_N(w_N^t; z_{Nn}^t) + \nabla f_N(\bar{w}_N^t; \bar{z}_{Nn}^t) \right\| \right).
\end{aligned}$$

Taking conditional expectation with respect to (w.r.t.)  $J_i^t$ , we derive

$$\begin{aligned}
& \mathbb{E}_{J_i^t} [\|w^{t+1} - \bar{w}^{t+1}\|] \\
& \leq \frac{N-M}{N} \left( \left( 1 + \frac{\beta\eta_t}{b_1M} \sum_{i \in \mathcal{M}_t} \sum_{j \in [n]} \mathbb{E}_{J_i^t} [\alpha_{ij}^t] \right) \|w^t - \bar{w}^t\| + \frac{\eta_t}{b_1M} \sum_{i \in \mathcal{M}_t} \sum_{j \in [n]} \mathbb{E}_{J_i^t} [\alpha_{ij}^t] \left( \frac{\mu\beta}{b_2} \sum_{l=1}^{b_2} \|v_{i,l}^t\|^3 \right. \right. \\
& \left. \left. + \left\| \frac{1}{b_2} \sum_{l=1}^{b_2} \langle \nabla f_i(w_i^t; z_{ij}^t) - \nabla f_i(\bar{w}_i^t; z_{ij}^t), v_{i,l}^t \rangle v_{i,l}^t - \nabla f_i(w_i^t; z_{ij}^t) + \nabla f_i(\bar{w}_i^t; z_{ij}^t) \right\| \right) \right) \\
& + \frac{M}{N} \left( \left( 1 + \frac{\beta\eta_t}{b_1M} \sum_{P_t} \mathbb{E}_{J_i^t} [\alpha_{ij}^t] \right) \|w^t - \bar{w}^t\| + \frac{2\eta_t}{b_1M} \mathbb{E}_{J_N^t} [\alpha_{Nn}^t] \|\nabla f_N(w_N^t; z_{Nn}^t)\| \right. \\
& \left. + \frac{\eta_t}{b_1M} \sum_{i \in \mathcal{M}_t} \sum_{j \in [n]} \mathbb{E}_{J_i^t} [\alpha_{ij}^t] \frac{\mu\beta}{b_2} \sum_{l=1}^{b_2} \|v_{i,l}^t\|^3 + \frac{\eta_t}{b_1M} \sum_{P_t} \mathbb{E}_{J_i^t} [\alpha_{ij}^t] \right. \\
& \left\| \frac{1}{b_2} \sum_{l=1}^{b_2} \langle \nabla f_i(w_i^t; z_{ij}^t) - \nabla f_i(\bar{w}_i^t; z_{ij}^t), v_{i,l}^t \rangle v_{i,l}^t - \nabla f_i(w_i^t; z_{ij}^t) + \nabla f_i(\bar{w}_i^t; z_{ij}^t) \right\| + \frac{\eta_t}{b_1M} \mathbb{E}_{J_N^t} [\alpha_{Nn}^t] \\
& \left. \left\| \frac{1}{b_2} \sum_{l=1}^{b_2} \langle \nabla f_N(w_N^t; z_{Nn}^t) - \nabla f_N(\bar{w}_N^t; \bar{z}_{Nn}^t), v_{N,l}^t \rangle v_{N,l}^t - \nabla f_N(w_N^t; z_{Nn}^t) + \nabla f_N(\bar{w}_N^t; \bar{z}_{Nn}^t) \right\| \right) \\
& \leq (1 + \eta_t\beta) \|w^t - \bar{w}^t\| + \frac{2\eta_t}{nN} \|\nabla f_N(w_N^t; z_{Nn}^t)\| + \frac{\mu\eta_t\beta}{b_2} \sum_{l=1}^{b_2} \|v_{i,l}^t\|^3 \\
& + \eta_t \left\| \frac{1}{b_2} \sum_{l=1}^{b_2} \langle \nabla f_i(w_i^t; z_{ij}^t) - \nabla f_i(\bar{w}_i^t; z_{ij}^t), v_{i,l}^t \rangle v_{i,l}^t - \nabla f_i(w_i^t; z_{ij}^t) + \nabla f_i(\bar{w}_i^t; z_{ij}^t) \right\| \\
& + \frac{\eta_t}{nN} \left\| \frac{1}{b_2} \sum_{l=1}^{b_2} \langle \nabla f_N(w_N^t; z_{Nn}^t) - \nabla f_N(\bar{w}_N^t; \bar{z}_{Nn}^t), v_{N,l}^t \rangle v_{N,l}^t - \nabla f_N(w_N^t; z_{Nn}^t) + \nabla f_N(\bar{w}_N^t; \bar{z}_{Nn}^t) \right\|.
\end{aligned}$$

Further taking expectation w.r.t. all randomness and utilizing Lemmas 4, 5, we obtain that

$$\begin{aligned}
& \mathbb{E} [\|w^{t+1} - \bar{w}^{t+1}\|] \\
& \leq (1 + \eta_t\beta) \mathbb{E} [\|w^t - \bar{w}^t\|] + \frac{2\eta_t}{nN} \mathbb{E} [\|\nabla f_N(w_N^t; z_{Nn}^t)\|] + \mu\eta_t\beta \mathbb{E} [\|v_{i,l}^t\|^3] \\
& + \eta_t \mathbb{E} \left[ \left\| \frac{1}{b_2} \sum_{l=1}^{b_2} \langle \nabla f_i(w_i^t; z_{ij}^t) - \nabla f_i(\bar{w}_i^t; z_{ij}^t), v_{i,l}^t \rangle v_{i,l}^t - \nabla f_i(w_i^t; z_{ij}^t) + \nabla f_i(\bar{w}_i^t; z_{ij}^t) \right\| \right] \\
& + \frac{\eta_t}{nN} \mathbb{E} \left[ \left\| \frac{1}{b_2} \sum_{l=1}^{b_2} \langle \nabla f_N(w_N^t; z_{Nn}^t) - \nabla f_N(\bar{w}_N^t; \bar{z}_{Nn}^t), v_{N,l}^t \rangle v_{N,l}^t - \nabla f_N(w_N^t; z_{Nn}^t) + \nabla f_N(\bar{w}_N^t; \bar{z}_{Nn}^t) \right\| \right] \\
& \leq (1 + \eta_t\beta) \mathbb{E} [\|w^t - \bar{w}^t\|] + \frac{2\eta_t}{nN} \mathbb{E} [\|\nabla f_N(w_N^t; z_{Nn}^t)\|] + \frac{d\mu\eta_t\beta}{d+3} \\
& + \eta_t \sqrt{\frac{d}{b_2}} \mathbb{E} [\|\nabla f_i(w_i^t; z_{ij}^t) - \nabla f_i(\bar{w}_i^t; z_{ij}^t)\|] + \frac{\eta_t}{nN} \sqrt{\frac{d}{b_2}} \mathbb{E} [\|\nabla f_N(w_N^t; z_{Nn}^t) - \nabla f_N(\bar{w}_N^t; \bar{z}_{Nn}^t)\|]
\end{aligned}$$

$$\begin{aligned}
&\leq \left(1 + \left(1 + \sqrt{\frac{d}{b_2}}\right) \eta_t \beta\right) \mathbb{E}[\|w^t - \bar{w}^t\|] \\
&\quad + \left(\frac{2}{nN} \mathbb{E}[\|\nabla f_N(w_N^t; z_{Nn}^t)\|] + \mu\beta + \frac{2}{nN} \sqrt{\frac{d}{b_2}} \mathbb{E}[\|\nabla f_N(w_N^t; z_{Nj}^t)\|]\right) \eta_t. \tag{7}
\end{aligned}$$

To measure the stability, we need to obtain the upper bound of  $\mathbb{E}[\|\nabla f_N(w_N^t; z_{Nj}^t)\|]$ ,  $j = 1, \dots, n$ . Based on Equation (1), the update of FedZO, triangular inequality, Lemmas 4, 5 and Assumption 3, we provide that

$$\begin{aligned}
&\mathbb{E}[F_S(w^{t+1}) - F_S(w^t)] \\
&\leq \mathbb{E}\left[\langle w^{t+1} - w^t, \nabla F_S(w^t) \rangle + \frac{1}{2} \beta \|w^{t+1} - w^t\|^2\right] \\
&= \mathbb{E}\left[\left\langle -\frac{\eta_t}{b_1 M} \sum_{i \in \mathcal{M}_t} \sum_{m \in [b_1]} \tilde{\nabla} f_i(w_i^t; z_{i,m}^t), \nabla F_S(w^t) \right\rangle + \frac{1}{2} \beta \left\| \frac{\eta_t}{b_1 M} \sum_{i \in \mathcal{M}_t} \sum_{m \in [b_1]} \tilde{\nabla} f_i(w_i^t; z_{i,m}^t) \right\|^2\right] \\
&= -\frac{\eta_t}{b_1 M} \sum_{i \in \mathcal{M}_t} \sum_{m \in [b_1]} \mathbb{E}\left[\langle \tilde{\nabla} f_i(w_i^t; z_{i,m}^t) - \nabla f_i(w_i^t; z_{i,m}^t) + \nabla f_i(w_i^t; z_{i,m}^t), \nabla F_S(w^t) \rangle\right] \\
&\quad + \frac{\beta}{2} \mathbb{E}\left[\left\| \frac{\eta_t}{b_1 M} \sum_{i \in \mathcal{M}_t} \sum_{m \in [b_1]} \left(\tilde{\nabla} f_i(w_i^t; z_{i,m}^t) - \nabla f_i(w_i^t; z_{i,m}^t) + \nabla f_i(w_i^t; z_{i,m}^t)\right) \right\|^2\right] \\
&\leq -\frac{\eta_t}{b_1 M} \sum_{i \in \mathcal{M}_t} \sum_{m \in [b_1]} \mathbb{E}\left[\langle \tilde{\nabla} f_i(w_i^t; z_{i,m}^t) - \nabla f_i(w_i^t; z_{i,m}^t), \nabla F_S(w^t) \rangle\right] - \eta_t \mathbb{E}[\|\nabla F_S(w^t)\|^2] \\
&\quad + \beta \eta_t^2 \mathbb{E}\left[\left\| \tilde{\nabla} f_i(w_i^t; z_{i,m}^t) - \nabla f_i(w_i^t; z_{i,m}^t) \right\|^2\right] + \beta \eta_t^2 \mathbb{E}[\|\nabla F_S(w^t)\|^2] \\
&\leq \frac{\eta_t}{2b_1 M} \sum_{i \in \mathcal{M}_t} \sum_{m \in [b_1]} \mathbb{E}\left[\left\| \tilde{\nabla} f_i(w_i^t; z_{i,m}^t) - \nabla f_i(w_i^t; z_{i,m}^t) \right\|^2\right] + \frac{\eta_t}{2} \mathbb{E}[\|\nabla F_S(w^t)\|^2] \\
&\quad - \eta_t \mathbb{E}[\|\nabla F_S(w^t)\|^2] + \beta \eta_t^2 \mathbb{E}\left[\left\| \tilde{\nabla} f_i(w_i^t; z_{i,m}^t) - \nabla f_i(w_i^t; z_{i,m}^t) \right\|^2\right] + \beta \eta_t^2 \mathbb{E}[\|\nabla F_S(w^t)\|^2] \\
&\leq \left(\beta \eta_t^2 - \frac{\eta_t}{2}\right) \mathbb{E}[\|\nabla F_S(w^t)\|^2] + \left(\frac{\eta_t}{2b_1 M} + \frac{\beta \eta_t^2}{b_1 M}\right) \sum_{i \in \mathcal{M}_t} \sum_{m \in [b_1]} \left(\frac{\mu^2 \beta^2}{4} \mathbb{E}[\|v_{i,l}^t\|^6]\right) \\
&\quad + \frac{d}{b_2} \mathbb{E}\left[\left\| \nabla f_i(w_i^t; z_{i,m}^t) \right\|^2\right] \\
&= \left(\left(1 + \frac{d}{b_2}\right) \beta \eta_t^2 - \left(\frac{1}{2} - \frac{d}{2b_2}\right) \eta_t\right) \mathbb{E}[\|\nabla F_S(w^t)\|^2] + \frac{d\mu^2 \beta^3 \eta_t^2}{4(d+6)} + \frac{d\mu^2 \beta^2 \eta_t}{8(d+6)} \\
&\leq -\left(\frac{1}{4} - \frac{d}{4b_2}\right) \eta_t \mathbb{E}[\|\nabla F_S(w^t)\|^2] + \frac{\mu^2 \beta^3 \eta_t^2}{4} + \frac{\mu^2 \beta^2 \eta_t}{8} \\
&\leq -\left(\frac{1}{2} - \frac{d}{2b_2}\right) \alpha \eta_t \mathbb{E}[F_S(w^t) - F_S(w(S))] + \frac{\mu^2 \beta^3 \eta_t^2}{4} + \frac{\mu^2 \beta^2 \eta_t}{8}. \tag{8}
\end{aligned}$$

Then,

$$\begin{aligned}
&\mathbb{E}[F_S(w^{t+1}) - F_S(w(S))] \\
&\leq \left(1 - \left(\frac{1}{2} - \frac{d}{2b_2}\right) \alpha \eta_t\right) \mathbb{E}[F_S(w^t) - F_S(w(S))] + \frac{\mu^2 \beta^3 \eta_t^2}{4} + \frac{\mu^2 \beta^2 \eta_t}{8} \\
&\leq \mathbb{E}[F_S(w^t) - F_S(w(S))] + \frac{\mu^2 \beta^3 \eta_t^2}{4} + \frac{\mu^2 \beta^2 \eta_t}{8} \\
&\leq \mathbb{E}[F_S(w^1) - F_S(w(S))] + \sum_{i=1}^t \left(\frac{\mu^2 \beta^3 \eta_t^2}{4} + \frac{\mu^2 \beta^2 \eta_t}{8}\right)
\end{aligned}$$

$$\begin{aligned}
&\leq \mathbb{E} [F_S(w^1) - F_S(w(S))] + \frac{\mu^2 \beta^3 \eta_1^2}{4} \sum_{i=1}^t i^{-2} + \frac{\mu^2 \beta^2 \eta_1}{8} \sum_{i=1}^t i^{-1} \\
&\leq \mathbb{E} [F_S(w^1) - F_S(w(S))] + \frac{\mu^2 \beta^3 \eta_1^2}{2} + \frac{\mu^2 \beta^2 \eta_1}{8} \log(et),
\end{aligned}$$

where the last inequality is due to Lemma 3 (a), (b). It follows from Lemma 1 (2) that

$$\begin{aligned}
&\mathbb{E}[\|\nabla f_N(w_N^t; z_{Nj}^t)\|^2] \\
&\leq 2\beta \mathbb{E}[F_{S_N}(w_N^t)] = \frac{2\beta}{N} \sum_{i=1}^N \mathbb{E}[F_{S_i}(w_i^t)] = 2\beta \mathbb{E}[F_S(w^t)] \\
&\leq 2\beta \left( \mathbb{E}[F_S(w^1)] + \frac{\mu^2 \beta^3 \eta_1^2}{2} + \frac{\mu^2 \beta^2 \eta_1}{8} \log(e(t-1)) \right)
\end{aligned}$$

For convenience, we denote  $2\beta \left( \mathbb{E}[F_S(w^1)] + \frac{\mu^2 \beta^3 \eta_1^2}{2} + \frac{\mu^2 \beta^2 \eta_1}{8} \log(e(t-1)) \right)$  as  $\tau(t)$ . Then, from Equation (7), we know that

$$\begin{aligned}
&\mathbb{E}[\|w^{t+1} - \bar{w}^{t+1}\|] \\
&\leq \left( 1 + \left( 1 + \sqrt{\frac{d}{b_2}} \right) \eta_t \beta \right) \mathbb{E}[\|w^t - \bar{w}^t\|] + \left( \frac{2\sqrt{\tau(t)}}{nN} + \mu\beta + \frac{2\sqrt{\tau(t)}}{nN} \sqrt{\frac{d}{b_2}} \right) \eta_t.
\end{aligned}$$

Let  $a_1 = \left( 1 + \sqrt{\frac{d}{b_2}} \right) \beta$  and  $a_4(t) = \frac{2\sqrt{\tau(t)}}{nN} + \mu\beta + \frac{2\sqrt{\tau(t)}}{nN} \sqrt{\frac{d}{b_2}}$ . Taking summation from  $t = 1$  to  $T - 1$ , we deduce that

$$\begin{aligned}
&\mathbb{E}[\|w^T - \bar{w}^T\|] \\
&\leq \sum_{t=1}^{T-1} \left( \prod_{s=t+1}^{T-1} (1 + a_1 \eta_s) \right) a_4(t) \eta_t \\
&\leq \sum_{t=1}^{T-1} \exp \left( \sum_{s=t+1}^{T-1} a_1 \eta_s \right) a_4(T-1) \eta_t \\
&\leq \sum_{t=1}^{T-1} \exp \left( a_1 \eta_1 \sum_{s=1}^{T-1} s^{-1} \right) a_4(T-1) \eta_t \\
&\leq \exp \left( a_1 \eta_1 \sum_{s=1}^{T-1} s^{-1} \right) a_4(T-1) \eta_1 \sum_{t=1}^{T-1} t^{-1} \\
&\leq (e(T-1))^{a_1 \eta_1} a_4(T-1) \eta_1 \log(e(T-1)) \\
&\leq \mathcal{O} \left( \left( (nN)^{-1} \sqrt{\log T} + 1 \right) \mu T^{\frac{1}{4}} \log T \right).
\end{aligned}$$

□

**Proof of Corollary 2:** We integrate Theorem 1 (b) and Theorem 3 to obtain that

$$\begin{aligned}
&|\mathbb{E} [F(w^T) - F_S(w^T)]| \\
&\leq \frac{(4\theta)^\theta K}{nN} \sum_{i=1}^N \sum_{j=1}^n \mathbb{E} [\|w^T - \bar{w}^T\|] + 2\mathbb{E} [F_S(w^T)] \\
&= (4\theta)^\theta K \mathbb{E} [\|w^T - \bar{w}^T\|] + 2\mathbb{E} [F_S(w^T)] \\
&\leq \mathcal{O} \left( \left( (nN)^{-1} \sqrt{\log T} + 1 \right) (4\theta)^\theta (nN)^{-1} T^{\frac{1}{4}} \log T \right).
\end{aligned}$$

The proof is complete. □

**Proof of Theorem 4:** According to Equation (8),

$$\mathbb{E}[F_S(w^{t+1}) - F_S(w^t)]$$

$$\leq - \left( \frac{1}{2} - \frac{d}{2b_2} \right) \alpha \eta_t \mathbb{E} [F_S(w^t) - F_S(w(S))] + \frac{\mu^2 \beta^3 \eta_t^2}{4} + \frac{\mu^2 \beta^2 \eta_t}{8},$$

that is

$$\begin{aligned} & \mathbb{E}[F_S(w^{t+1}) - F_S(w(S))] \\ & \leq \left( 1 - \left( \frac{1}{2} - \frac{d}{2b_2} \right) \alpha \eta_t \right) \mathbb{E} [F_S(w^t) - F(w(S))] + \frac{\mu^2 \beta^3 \eta_t^2}{4} + \frac{\mu^2 \beta^2 \eta_t}{8} \\ & = \left( 1 - \left( \frac{1}{2} - \frac{d}{2b_2} \right) \frac{\alpha \eta_1}{t} \right) \mathbb{E} [F_S(w^t) - F(w(S))] + \frac{\mu^2 \beta^3 \eta_1^2}{4} t^{-2} + \frac{\mu^2 \beta^2 \eta_1}{8} t^{-1}. \end{aligned}$$

We multiply both sides of the above inequality by  $t \left( t - \left( \frac{1}{4} - \frac{d}{4b_2} \right) \alpha \eta_1 \right)$  to get

$$\begin{aligned} & t \left( t - \left( \frac{1}{4} - \frac{d}{4b_2} \right) \alpha \eta_1 \right) \mathbb{E}[F_S(w^{t+1}) - F(w(S))] \\ & \leq \left( t - \left( \frac{1}{4} - \frac{d}{4b_2} \right) \alpha \eta_1 \right) \left( t - \left( \frac{1}{2} - \frac{d}{2b_2} \right) \alpha \eta_1 \right) \mathbb{E} [F_S(w^t) - F(w(S))] \\ & \quad + \frac{\mu^2 \beta^3 \eta_1^2}{4} + \frac{\mu^2 \beta^2 \eta_1}{8} t \\ & \leq \left( 1 - \left( \frac{1}{4} - \frac{d}{4b_2} \right) \alpha \eta_1 \right) \left( 1 - \left( \frac{1}{2} - \frac{d}{2b_2} \right) \alpha \eta_1 \right) \mathbb{E} [F_S(w^1) - F(w(S))] \\ & \quad + \frac{\mu^2 \beta^3 \eta_1^2 t}{4} + \frac{\mu^2 \beta^2 \eta_1}{8} \sum_{t'=1}^t t' \\ & \leq \left( 1 - \left( \frac{1}{4} - \frac{d}{4b_2} \right) \alpha \eta_1 \right) \left( 1 - \left( \frac{1}{2} - \frac{d}{2b_2} \right) \alpha \eta_1 \right) \mathbb{E} [F_S(w^1) - F(w(S))] \\ & \quad + \frac{\mu^2 \beta^3 \eta_1^2 t}{4} + \frac{\mu^2 \beta^2 \eta_1}{16} t(t+1). \end{aligned}$$

Therefore,

$$\begin{aligned} & \mathbb{E}[F_S(w^T) - F_S(w(S))] \\ & \leq \frac{\left( 1 - \left( \frac{1}{4} - \frac{d}{4b_2} \right) \alpha \eta_1 \right) \left( 1 - \left( \frac{1}{2} - \frac{d}{2b_2} \right) \alpha \eta_1 \right)}{(T-1) \left( T-1 - \left( \frac{1}{4} - \frac{d}{4b_2} \right) \alpha \eta_1 \right)} \mathbb{E} [F_S(w^1) - F(w(S))] \\ & \quad + \frac{\mu^2 \beta^3 \eta_1^2}{4 \left( T-1 - \left( \frac{1}{4} - \frac{d}{4b_2} \right) \alpha \eta_1 \right)} + \frac{\mu^2 \beta^2 \eta_1 T}{16 \left( T-1 - \left( \frac{1}{4} - \frac{d}{4b_2} \right) \alpha \eta_1 \right)} \\ & = \mathcal{O} (T^{-2} + \mu^2). \end{aligned}$$

The optimization bound is given. By integrating this optimization upper bound and the generalization upper bound in Corollary 2, we can get the following expected excess risk bound

$$\begin{aligned} & |\mathbb{E} [F(w^T) - F(w^*)]| \\ & \leq |\mathbb{E} [F(w^T) - F_S(w^T)]| + |\mathbb{E} [F_S(w^T) - F_S(w(S))]| \\ & \leq \mathcal{O} \left( T^{-2} + \mu^2 + \left( (nN)^{-1} \sqrt{\log T} + 1 \right) (4\theta)^\theta \mu T^{\alpha_1 \eta_1} \log T + \mathbb{E}[F_S(w^T)] \right). \end{aligned}$$

□

## B.5. Proofs of Theorem 5 and Theorem 6

**Proof of Theorem 5:** Let  $S^{(j_i)} = S^{(n_N)} = \{S_i\}_{i=1}^{N-1} \cup S_N^{(n)}$ . The update for asynchronous case can be reformulated as

$$w^{t+1} = w^t - \frac{\eta_t}{b_1 N} \sum_{i \in [N]} \sum_{j \in [n]} \alpha_{ij}^{t_i} \tilde{\nabla} f_i \left( w_i^{t_i}; z_{ij}^{t_i}, \left\{ v_{i,l}^{t_i} \right\}_{l=1}^{b_2}, \mu \right). \quad (9)$$

For the sake of simplicity, we denote  $\tilde{\nabla} f_i \left( w_i^{t_i}; z_{ij}^{t_i}, \{v_{i,l}^{t_i}\}_{l=1}^{b_2}, \mu \right)$  as  $\tilde{\nabla} f_i (w_i^{t_i}; z_{ij}^{t_i})$ . According to the new formulation, we can get

$$\begin{aligned} & \|w^{t+1} - \bar{w}^{t+1}\| \\ &= \left\| w^t - \bar{w}^t - \frac{\eta_t}{b_1 N} \sum_{i \in [N]} \sum_{j \in [n]} \alpha_{ij}^{t_i} \left( \tilde{\nabla} f_i (w_i^{t_i}; z_{ij}^{t_i}) - \tilde{\nabla} f_i (\bar{w}_i^{t_i}; \bar{z}_{ij}^{t_i}) \right) \right\| \\ &\leq \left\| w^t - \bar{w}^t - \frac{\eta_t}{b_1 N} \sum_{i \in [N]} \sum_{j \in [n]} \alpha_{ij}^{t_i} \left( \nabla f_i (w_i^{t_i}; z_{ij}^{t_i}) - \nabla f_i (\bar{w}_i^{t_i}; \bar{z}_{ij}^{t_i}) \right) \right\| \end{aligned} \quad (10)$$

$$+ \left\| \frac{\eta_t}{b_1 N} \sum_{i \in [N]} \sum_{j \in [n]} \alpha_{ij}^{t_i} \left( \tilde{\nabla} f_i (w_i^{t_i}; z_{ij}^{t_i}) - \tilde{\nabla} f_i (\bar{w}_i^{t_i}; \bar{z}_{ij}^{t_i}) - \nabla f_i (w_i^{t_i}; z_{ij}^{t_i}) + \nabla f_i (\bar{w}_i^{t_i}; \bar{z}_{ij}^{t_i}) \right) \right\|. \quad (11)$$

In the sequel, we separately give the upper bounds for (9) and (10). Let  $P_t = \{(i, j) | i \in [N-1], j \in [n] \text{ or } i = N, j \in [n-1]\}$ , then

$$\begin{aligned} & (10) \\ & \leq \|w^t - \bar{w}^t\| + \frac{\eta_t}{b_1 N} \alpha_{Nn}^{t_N} \|\nabla f_N(w_N^{t_N}; z_{Nn}^{t_N}) - \nabla f_N(\bar{w}_N^{t_N}; \bar{z}_{Nn}^{t_N})\| \\ & \quad + \frac{\eta_t}{b_1 N} \sum_{P_t} \alpha_{ij}^{t_i} \|\nabla f_i(w_i^{t_i}; z_{ij}^{t_i}) - \nabla f_i(\bar{w}_i^{t_i}; \bar{z}_{ij}^{t_i})\| \\ & \leq \|w^t - \bar{w}^t\| + \frac{2\eta_t}{b_1 N} \alpha_{Nn}^{t_N} \|\nabla f_N(w_N^{t_N}; z_{Nn}^{t_N})\| + \frac{\beta\eta_t}{b_1 N} \sum_{P_t} \alpha_{ij}^{t_i} \|w_i^{t_i} - \bar{w}_i^{t_i}\| \\ & \leq \|w^t - \bar{w}^t\| + \frac{2\eta_t}{b_1 N} \alpha_{Nn}^{t_N} \|\nabla f_N(w_N^{t_N}; z_{Nn}^{t_N})\| + \frac{\beta\eta_t}{b_1 N} \sum_{P_t} \alpha_{ij}^{t_i} (\|w_i^{t_i} - w^t - \bar{w}_i^{t_i} + \bar{w}^t\| + \|w^t - \bar{w}^t\|) \\ & \leq \left( 1 + \frac{\beta\eta_t}{b_1 N} \sum_{P_t} \alpha_{ij}^{t_i} \right) \|w^t - \bar{w}^t\| + \frac{2\eta_t}{b_1 N} \alpha_{Nn}^{t_N} \|\nabla f_N(w_N^{t_N}; z_{Nn}^{t_N})\| \\ & \quad + \frac{\beta\eta_t}{b_1 N} \sum_{P_t} \alpha_{ij}^{t_i} \left\| \sum_{t'=t_i}^{t-1} \left( \frac{\eta_{t'}}{b_1 N} \sum_{i' \in [N]} \sum_{j' \in [n]} \alpha_{i'j'}^{t'_{i'}} \left( \tilde{\nabla} f_{i'} (w_{i'}^{t'_{i'}}; z_{i'j'}^{t'_{i'}}) - \tilde{\nabla} f_{i'} (\bar{w}_{i'}^{t'_{i'}}; \bar{z}_{i'j'}^{t'_{i'}}) \right) \right) \right\| \\ & \leq \left( 1 + \frac{\beta\eta_t}{b_1 N} \sum_{P_t} \alpha_{ij}^{t_i} \right) \|w^t - \bar{w}^t\| + \frac{2\eta_t}{b_1 N} \alpha_{Nn}^{t_N} \|\nabla f_N(w_N^{t_N}; z_{Nn}^{t_N})\| \\ & \quad + \frac{\beta\eta_t}{b_1 N} \sum_{P_t} \alpha_{ij}^{t_i} \left( \sum_{t'=t_i}^{t-1} \left( \frac{\eta_{t'}}{b_1 N} \sum_{i' \in [N]} \sum_{j' \in [n]} \alpha_{i'j'}^{t'_{i'}} \left( \|\nabla f_{i'} (w_{i'}^{t'_{i'}}; z_{i'j'}^{t'_{i'}}) - \nabla f_{i'} (\bar{w}_{i'}^{t'_{i'}}; \bar{z}_{i'j'}^{t'_{i'}})\| \right. \right. \right. \\ & \quad \left. \left. \left. + \left\| \tilde{\nabla} f_{i'} (w_{i'}^{t'_{i'}}; z_{i'j'}^{t'_{i'}}) - \tilde{\nabla} f_{i'} (\bar{w}_{i'}^{t'_{i'}}; \bar{z}_{i'j'}^{t'_{i'}}) - \nabla f_{i'} (w_{i'}^{t'_{i'}}; z_{i'j'}^{t'_{i'}}) + \nabla f_{i'} (\bar{w}_{i'}^{t'_{i'}}; \bar{z}_{i'j'}^{t'_{i'}}) \right\| \right) \right) \right) \\ & \leq \left( 1 + \frac{\beta\eta_t}{b_1 N} \sum_{P_t} \alpha_{ij}^{t_i} \right) \|w^t - \bar{w}^t\| + \frac{2\eta_t}{b_1 N} \alpha_{Nn}^{t_N} \|\nabla f_N(w_N^{t_N}; z_{Nn}^{t_N})\| \\ & \quad + \frac{\beta\eta_t}{b_1 N} \sum_{P_t} \alpha_{ij}^{t_i} \left( \sum_{t'=t_i}^{t-1} \left( \frac{\eta_{t'}}{b_1 N} \sum_{i' \in [N]} \sum_{j' \in [n]} \alpha_{i'j'}^{t'_{i'}} \left( \frac{\mu\beta}{b_2} \sum_{l=1}^{b_2} \|v_{i',l}^{t'_{i'}}\|^3 + 2 \|\nabla f_{i'} (w_{i'}^{t'_{i'}}; z_{i'j'}^{t'_{i'}})\| \right. \right. \right. \\ & \quad \left. \left. \left. + \left\| \frac{1}{b_2} \sum_{l=1}^{b_2} \left\langle \nabla f_{i'} (w_{i'}^{t'_{i'}}; z_{i'j'}^{t'_{i'}}) - \nabla f_{i'} (\bar{w}_{i'}^{t'_{i'}}; \bar{z}_{i'j'}^{t'_{i'}}), v_{i',l}^{t'_{i'}} \right\rangle v_{i',l}^{t'_{i'}} - \nabla f_{i'} (w_{i'}^{t'_{i'}}; z_{i'j'}^{t'_{i'}}) + \nabla f_{i'} (\bar{w}_{i'}^{t'_{i'}}; \bar{z}_{i'j'}^{t'_{i'}}) \right\| \right) \right) \right). \end{aligned} \quad (11)$$

$$\begin{aligned}
&\leq \frac{\eta_t}{b_{1N}} \sum_{P_t} \alpha_{ij}^{t_i} \left\| \tilde{\nabla} f_i(w_i^{t_i}; z_{ij}^{t_i}) - \tilde{\nabla} f_i(\bar{w}_i^{t_i}; \bar{z}_{ij}^{t_i}) - \nabla f_i(w_i^{t_i}; z_{ij}^{t_i}) + \nabla f_i(\bar{w}_i^{t_i}; \bar{z}_{ij}^{t_i}) \right\| \\
&\quad + \frac{\eta_t}{b_{1N}} \alpha_{Nn}^{t_N} \left\| \tilde{\nabla} f_N(w_N^{t_N}; z_{Nn}^{t_N}) - \tilde{\nabla} f_N(\bar{w}_N^{t_N}; \bar{z}_{Nn}^{t_N}) - \nabla f_N(w_N^{t_N}; z_{Nn}^{t_N}) + \nabla f_N(\bar{w}_N^{t_N}; \bar{z}_{Nn}^{t_N}) \right\| \\
&\leq \frac{\eta_t}{b_{1N}} \sum_{i \in [N]} \sum_{j \in [n]} \alpha_{ij}^{t_i} \frac{\mu\beta}{b_2} \sum_{l=1}^{b_2} \|v_{i,l}^{t_i}\|^3 + \frac{\eta_{t_i}}{b_{1N}} \sum_{P_t} \alpha_{ij}^{t_i} \\
&\quad \left\| \frac{1}{b_2} \sum_{l=1}^{b_2} \langle \nabla f_i(w_i^{t_i}; z_{ij}^{t_i}) - \nabla f_i(\bar{w}_i^{t_i}; \bar{z}_{ij}^{t_i}), v_{i,l}^{t_i} \rangle v_{i,l}^{t_i} - \nabla f_i(w_i^{t_i}; z_{ij}^{t_i}) + \nabla f_i(\bar{w}_i^{t_i}; \bar{z}_{ij}^{t_i}) \right\| + \frac{\eta_t}{b_{1N}} \alpha_{Nn}^{t_N} \\
&\quad \left\| \frac{1}{b_2} \sum_{l=1}^{b_2} \langle \nabla f_N(w_N^{t_N}; z_{Nn}^{t_N}) - \nabla f_N(\bar{w}_N^{t_N}; \bar{z}_{Nn}^{t_N}), v_{N,l}^{t_N} \rangle v_{N,l}^{t_N} - \nabla f_N(w_N^{t_N}; z_{Nn}^{t_N}) + \nabla f_N(\bar{w}_N^{t_N}; \bar{z}_{Nn}^{t_N}) \right\|.
\end{aligned}$$

Then, combining the above two inequalities, we obtain that

$$\begin{aligned}
&\|w^{t+1} - \bar{w}^{t+1}\| \\
&\leq \left( 1 + \frac{\beta\eta_t}{b_{1N}} \sum_{P_t} \alpha_{ij}^{t_i} \right) \|w^t - \bar{w}^t\| + \frac{2\eta_t}{b_{1N}} \alpha_{Nn}^{t_N} \|\nabla f_N(w_N^{t_N}; z_{Nn}^{t_N})\| \\
&\quad + \frac{\beta\eta_t}{b_{1N}} \sum_{P_t} \alpha_{ij}^{t_i} \left( \sum_{t'=t_i}^{t-1} \left( \frac{\eta_{t'}}{b_{1N}} \sum_{i' \in [N]} \sum_{j' \in [n]} \alpha_{i'j'}^{t'} \left( \frac{\mu\beta}{b_2} \sum_{l=1}^{b_2} \|v_{i',l}^{t'}\|^3 + 2 \|\nabla f_{i'}(w_{i'}^{t'}; z_{i'j'}^{t'})\| \right) \right. \right. \\
&\quad \left. \left. + \left\| \frac{1}{b_2} \sum_{l=1}^{b_2} \langle \nabla f_{i'}(w_{i'}^{t'}; z_{i'j'}^{t'}) - \nabla f_{i'}(\bar{w}_{i'}^{t'}; \bar{z}_{i'j'}^{t'}), v_{i',l}^{t'} \rangle v_{i',l}^{t'} - \nabla f_{i'}(w_{i'}^{t'}; z_{i'j'}^{t'}) + \nabla f_{i'}(\bar{w}_{i'}^{t'}; \bar{z}_{i'j'}^{t'}) \right\| \right) \right) \\
&\quad + \frac{\eta_t}{b_{1N}} \sum_{i \in [N]} \sum_{j \in [n]} \alpha_{ij}^{t_i} \frac{\mu\beta}{b_2} \sum_{l=1}^{b_2} \|v_{i,l}^{t_i}\|^3 + \frac{\eta_{t_i}}{b_{1N}} \sum_{P_t} \alpha_{ij}^{t_i} \\
&\quad \left\| \frac{1}{b_2} \sum_{l=1}^{b_2} \langle \nabla f_i(w_i^{t_i}; z_{ij}^{t_i}) - \nabla f_i(\bar{w}_i^{t_i}; \bar{z}_{ij}^{t_i}), v_{i,l}^{t_i} \rangle v_{i,l}^{t_i} - \nabla f_i(w_i^{t_i}; z_{ij}^{t_i}) + \nabla f_i(\bar{w}_i^{t_i}; \bar{z}_{ij}^{t_i}) \right\| + \frac{\eta_t}{b_{1N}} \alpha_{Nn}^{t_N} \\
&\quad \left\| \frac{1}{b_2} \sum_{l=1}^{b_2} \langle \nabla f_N(w_N^{t_N}; z_{Nn}^{t_N}) - \nabla f_N(\bar{w}_N^{t_N}; \bar{z}_{Nn}^{t_N}), v_{N,l}^{t_N} \rangle v_{N,l}^{t_N} - \nabla f_N(w_N^{t_N}; z_{Nn}^{t_N}) + \nabla f_N(\bar{w}_N^{t_N}; \bar{z}_{Nn}^{t_N}) \right\|.
\end{aligned}$$

Define  $J_i = \{J_i^1, \dots, J_i^t\}$ ,  $J_i^{t'} = \{z_{i,1}^{t'}, \dots, z_{i,b_1}^{t'}\}$ ,  $t' \in [t]$ ,  $t \in \mathbb{N}$ ,  $i \in [N]$ . Taking conditional expectation w.r.t.  $J_i$ , we derive

$$\begin{aligned}
&\mathbb{E}_{J_i}[\|w^{t+1} - \bar{w}^{t+1}\|] \\
&\leq \left( 1 + \frac{\beta\eta_t}{b_{1N}} \sum_{P_t} \mathbb{E}_{J_i}[\alpha_{ij}^{t_i}] \right) \|w^t - \bar{w}^t\| + \frac{2\eta_t}{b_{1N}} \mathbb{E}_{J_i}[\alpha_{Nn}^{t_N}] \|\nabla f_N(w_N^{t_N}; z_{Nn}^{t_N})\| \\
&\quad + \frac{\beta\eta_t}{b_{1N}} \sum_{P_t} \mathbb{E}_{J_i}[(\alpha_{ij}^{t_i})^2] \left( \frac{\eta_{t_i}}{b_{1N}} \left( \frac{\mu\beta}{b_2} \sum_{l=1}^{b_2} \|v_{i,l}^{t_i}\|^3 + 2 \|\nabla f_i(w_i^{t_i}; z_{ij}^{t_i})\| \right) \right. \\
&\quad \left. + \left\| \frac{1}{b_2} \sum_{l=1}^{b_2} \langle \nabla f_i(w_i^{t_i}; z_{ij}^{t_i}) - \nabla f_i(\bar{w}_i^{t_i}; \bar{z}_{ij}^{t_i}), v_{i,l}^{t_i} \rangle v_{i,l}^{t_i} - \nabla f_i(w_i^{t_i}; z_{ij}^{t_i}) + \nabla f_i(\bar{w}_i^{t_i}; \bar{z}_{ij}^{t_i}) \right\| \right) \\
&\quad + \frac{\beta\eta_t}{b_{1N}} \sum_{P_t} (\mathbb{E}_{J_i}[\alpha_{ij}^{t_i}])^2 \left( \frac{\eta_{t_i}}{b_{1N}} \sum_{\substack{i' \in [N] \\ i' \neq i}} \sum_{\substack{j' \in [n] \\ j' \neq j}} \left( \frac{\mu\beta}{b_2} \sum_{l=1}^{b_2} \|v_{i',l}^{t'}\|^3 + 2 \|\nabla f_{i'}(w_{i'}^{t'}; z_{i'j'}^{t'})\| \right) \right. \\
&\quad \left. + \left\| \frac{1}{b_2} \sum_{l=1}^{b_2} \langle \nabla f_{i'}(w_{i'}^{t'}; z_{i'j'}^{t'}) - \nabla f_{i'}(\bar{w}_{i'}^{t'}; \bar{z}_{i'j'}^{t'}), v_{i',l}^{t'} \rangle v_{i',l}^{t'} - \nabla f_{i'}(w_{i'}^{t'}; z_{i'j'}^{t'}) + \nabla f_{i'}(\bar{w}_{i'}^{t'}; \bar{z}_{i'j'}^{t'}) \right\| \right)
\end{aligned}$$

$$\begin{aligned}
& + \frac{\beta\eta_t}{b_1N} \sum_{P_t} (\mathbb{E}_{J_i}[\alpha_{ij}^{t_i}])^2 \left( \sum_{t'=t_i+1}^{t-1} \left( \frac{\eta_{t'}}{b_1N} \sum_{i' \in [N]} \sum_{j' \in [n]} \left( \frac{\mu\beta}{b_2} \sum_{l=1}^{b_2} \|v_{i',l}^{t'}\|^3 + 2 \|\nabla f_{i'}(w_{i'}^{t'}; z_{i'j'}^{t'})\| \right. \right. \right. \\
& + \left. \left. \left. \left\| \frac{1}{b_2} \sum_{l=1}^{b_2} \langle \nabla f_{i'}(w_{i'}^{t'}; z_{i'j'}^{t'}) - \nabla f_{i'}(\bar{w}_{i'}^{t'}; \bar{z}_{i'j'}^{t'}), v_{i',l}^{t'} \rangle v_{i',l}^{t'} - \nabla f_{i'}(w_{i'}^{t'}; z_{i'j'}^{t'}) + \nabla f_{i'}(\bar{w}_{i'}^{t'}; \bar{z}_{i'j'}^{t'}) \right\| \right) \right) \\
& + \frac{\eta_t}{b_1N} \sum_{i \in [N]} \sum_{j \in [n]} \mathbb{E}_{J_i}[\alpha_{ij}^{t_i}] \frac{\mu\beta}{b_2} \sum_{l=1}^{b_2} \|v_{i,l}^{t_i}\|^3 + \frac{\eta_{t_i}}{b_1N} \sum_{P_t} \mathbb{E}_{J_i}[\alpha_{ij}^{t_i}] \\
& \left\| \frac{1}{b_2} \sum_{l=1}^{b_2} \langle \nabla f_i(w_i^{t_i}; z_{ij}^{t_i}) - \nabla f_i(\bar{w}_i^{t_i}; \bar{z}_{ij}^{t_i}), v_{i,l}^{t_i} \rangle v_{i,l}^{t_i} - \nabla f_i(w_i^{t_i}; z_{ij}^{t_i}) + \nabla f_i(\bar{w}_i^{t_i}; \bar{z}_{ij}^{t_i}) \right\| + \frac{\eta_t}{b_1N} \mathbb{E}_{J_i}[\alpha_{Nn}^{t_N}] \\
& \left\| \frac{1}{b_2} \sum_{l=1}^{b_2} \langle \nabla f_N(w_N^{t_N}; z_{Nn}^{t_N}) - \nabla f_N(\bar{w}_N^{t_N}; \bar{z}_{Nn}^{t_N}), v_{N,l}^{t_N} \rangle v_{N,l}^{t_N} - \nabla f_N(w_N^{t_N}; z_{Nn}^{t_N}) + \nabla f_N(\bar{w}_N^{t_N}; \bar{z}_{Nn}^{t_N}) \right\| \\
& \leq (1 + \beta\eta_t) \|w^t - \bar{w}^t\| + \frac{2\eta_t}{nN} \|\nabla f_N(w_N^{t_N}; z_{Nn}^{t_N})\| \\
& + \frac{\beta\eta_t}{b_1nN^2} \left( 1 + \frac{b_1-1}{n} \right) \sum_{P_t} \eta_{t_i} \left( \frac{\mu\beta}{b_2} \sum_{l=1}^{b_2} \|v_{i,l}^{t_i}\|^3 + 2 \|\nabla f_i(w_i^{t_i}; z_{ij}^{t_i})\| \right. \\
& + \left. \left\| \frac{1}{b_2} \sum_{l=1}^{b_2} \langle \nabla f_i(w_i^{t_i}; z_{ij}^{t_i}) - \nabla f_i(\bar{w}_i^{t_i}; \bar{z}_{ij}^{t_i}), v_{i,l}^{t_i} \rangle v_{i,l}^{t_i} - \nabla f_i(w_i^{t_i}; z_{ij}^{t_i}) + \nabla f_i(\bar{w}_i^{t_i}; \bar{z}_{ij}^{t_i}) \right\| \right) \\
& + \frac{\beta\eta_t}{n^2N^2} \sum_{P_t} \eta_{t_i} \left( \sum_{\substack{i' \in [N], \\ i' \neq i}} \sum_{\substack{j' \in [n], \\ j' \neq j}} \left( \frac{\mu\beta}{b_2} \sum_{l=1}^{b_2} \|v_{i',l}^{t'}\|^3 + 2 \|\nabla f_{i'}(w_{i'}^{t'}; z_{i'j'}^{t'})\| \right. \right. \\
& + \left. \left. \left\| \frac{1}{b_2} \sum_{l=1}^{b_2} \langle \nabla f_{i'}(w_{i'}^{t'}; z_{i'j'}^{t'}) - \nabla f_{i'}(\bar{w}_{i'}^{t'}; \bar{z}_{i'j'}^{t'}), v_{i',l}^{t'} \rangle v_{i',l}^{t'} - \nabla f_{i'}(w_{i'}^{t'}; z_{i'j'}^{t'}) + \nabla f_{i'}(\bar{w}_{i'}^{t'}; \bar{z}_{i'j'}^{t'}) \right\| \right) \right) \\
& + \frac{\beta\eta_t}{n^2N^2} \sum_{P_t} \left( \sum_{t'=t_i+1}^{t-1} \left( \eta_{t'} \sum_{i' \in [N]} \sum_{j' \in [n]} \left( \frac{\mu\beta}{b_2} \sum_{l=1}^{b_2} \|v_{i',l}^{t'}\|^3 + 2 \|\nabla f_{i'}(w_{i'}^{t'}; z_{i'j'}^{t'})\| \right. \right. \right. \\
& + \left. \left. \left. \left\| \frac{1}{b_2} \sum_{l=1}^{b_2} \langle \nabla f_{i'}(w_{i'}^{t'}; z_{i'j'}^{t'}) - \nabla f_{i'}(\bar{w}_{i'}^{t'}; \bar{z}_{i'j'}^{t'}), v_{i',l}^{t'} \rangle v_{i',l}^{t'} - \nabla f_{i'}(w_{i'}^{t'}; z_{i'j'}^{t'}) + \nabla f_{i'}(\bar{w}_{i'}^{t'}; \bar{z}_{i'j'}^{t'}) \right\| \right) \right) \right) \\
& + \frac{\eta_t}{nN} \sum_{i \in [N]} \sum_{j \in [n]} \frac{\mu\beta}{b_2} \sum_{l=1}^{b_2} \|v_{i,l}^{t_i}\|^3 \\
& + \frac{\eta_t}{nN} \sum_{P_t} \left\| \frac{1}{b_2} \sum_{l=1}^{b_2} \langle \nabla f_i(w_i^{t_i}; z_{ij}^{t_i}) - \nabla f_i(\bar{w}_i^{t_i}; \bar{z}_{ij}^{t_i}), v_{i,l}^{t_i} \rangle v_{i,l}^{t_i} - \nabla f_i(w_i^{t_i}; z_{ij}^{t_i}) + \nabla f_i(\bar{w}_i^{t_i}; \bar{z}_{ij}^{t_i}) \right\| \\
& + \frac{\eta_t}{nN} \left\| \frac{1}{b_2} \sum_{l=1}^{b_2} \langle \nabla f_N(w_N^{t_N}; z_{Nn}^{t_N}) - \nabla f_N(\bar{w}_N^{t_N}; \bar{z}_{Nn}^{t_N}), v_{N,l}^{t_N} \rangle v_{N,l}^{t_N} - \nabla f_N(w_N^{t_N}; z_{Nn}^{t_N}) + \nabla f_N(\bar{w}_N^{t_N}; \bar{z}_{Nn}^{t_N}) \right\|.
\end{aligned}$$

Further taking expectation w.r.t. randomness and utilizing Lemmas 4, 5, we obtain that

$$\begin{aligned}
& \mathbb{E} [\|w^{t+1} - \bar{w}^{t+1}\|] \\
& \leq (1 + \beta\eta_t) \mathbb{E} [\|w^t - \bar{w}^t\|] + \frac{2\eta_t}{nN} \mathbb{E} [\|\nabla f_N(w_N^{t_N}; z_{Nn}^{t_N})\|] \\
& + \frac{\beta\eta_t}{b_1N} \left( 1 + \frac{b_1-1}{n} \right) \eta_{t-t_0} \left( \mu\beta \mathbb{E} [\|v_{i,l}^{t_i}\|^3] + \left( 2 + 2\sqrt{\frac{d}{b_2}} \right) \mathbb{E} [\|\nabla f_i(w_i^{t_i}; z_{ij}^{t_i})\|] \right)
\end{aligned}$$

$$\begin{aligned}
& + \beta \eta_t \eta_{t-t_0} \left( \mu \beta \mathbb{E} \left[ \left\| v_{i',l}^{t_{i'}} \right\|^3 \right] + \left( 2 + 2\sqrt{\frac{d}{b_2}} \right) \mathbb{E} \left[ \left\| \nabla f_{i'} \left( w_{i'}^{t_{i'}}; z_{i'j'}^{t_{i'}} \right) \right\| \right] \right) \\
& + \beta \eta_t (t_0 - 1) \eta_{t-t_0} \left( \mu \beta \mathbb{E} \left[ \left\| v_{i',l}^{t_{i'}} \right\|^3 \right] + \left( 2 + 2\sqrt{\frac{d}{b_2}} \right) \mathbb{E} \left[ \left\| \nabla f_{i'} \left( w_{i'}^{t_{i'}}; z_{i'j'}^{t_{i'}} \right) \right\| \right] \right) + \mu \beta \eta_t \mathbb{E} \left[ \left\| v_{i,l}^{t_i} \right\|^3 \right] \\
& + \frac{nN-1}{nN} \eta_t \mathbb{E} \left[ \left\| \nabla f_i \left( w_i^{t_i}; z_{ij}^{t_i} \right) - \nabla f_i \left( \bar{w}_i^{t_i}; z_{ij}^{t_i} \right) \right\| \right] + \frac{2\eta_t}{nN} \sqrt{\frac{d}{b_2}} \mathbb{E} \left[ \left\| \nabla f_N \left( \bar{w}_N^{t_N}; z_{Nn}^{t_N} \right) \right\| \right] \\
\leq & (1 + \beta \eta_t) \mathbb{E} \left[ \left\| w^t - \bar{w}^t \right\| \right] + \left( \mu \beta^2 \left( \frac{1}{b_1 N} \left( 1 + \frac{b_1 - 1}{n} \right) + t_0 \right) \eta_t \eta_{t-t_0} + \mu \beta \eta_t \right) \mathbb{E} \left[ \left\| v_{i,l}^{t_i} \right\|^3 \right] \\
& + \left( \beta \left( 2 + 2\sqrt{\frac{d}{b_2}} \right) \left( \left( \frac{1}{b_1 N} \left( 1 + \frac{b_1 - 1}{n} \right) + t_0 \right) \eta_t \eta_{t-t_0} + \frac{1}{nN} \eta_t \right) \right) \mathbb{E} \left[ \left\| \nabla f_i \left( w_i^{t_i}; z_{ij}^{t_i} \right) \right\| \right] \\
& + \beta \eta_t \mathbb{E} \left[ \left\| w_i^{t_i} - \bar{w}_i^{t_i} \right\| \right] \\
\leq & (1 + \beta \eta_t) \mathbb{E} \left[ \left\| w^t - \bar{w}^t \right\| \right] + \left( \mu \beta^2 \left( \frac{1}{b_1 N} \left( 1 + \frac{b_1 - 1}{n} \right) + t_0 \right) \eta_t \eta_{t-t_0} + \mu \beta \eta_t \right) \mathbb{E} \left[ \left\| v_{i,l}^{t_i} \right\|^3 \right] \\
& + \left( \beta \left( 2 + 2\sqrt{\frac{d}{b_2}} \right) \left( \left( \frac{1}{b_1 N} \left( 1 + \frac{b_1 - 1}{n} \right) + t_0 \right) \eta_t \eta_{t-t_0} + \frac{1}{nN} \eta_t \right) \right) \mathbb{E} \left[ \left\| \nabla f_i \left( w_i^{t_i}; z_{ij}^{t_i} \right) \right\| \right] \\
& + \beta \eta_t \left( \mathbb{E} \left[ \left\| w_i^{t_i} - \bar{w}_i^{t_i} - w^t + \bar{w}^t \right\| \right] + \mathbb{E} \left[ \left\| w^t - \bar{w}^t \right\| \right] \right) \\
\leq & (1 + 2\beta \eta_t) \mathbb{E} \left[ \left\| w^t - \bar{w}^t \right\| \right] + \left( \mu \beta^2 \left( \frac{1}{b_1 N} \left( 1 + \frac{b_1 - 1}{n} \right) + t_0 \right) \eta_t \eta_{t-t_0} + \mu \beta \eta_t \right) \mathbb{E} \left[ \left\| v_{i,l}^{t_i} \right\|^3 \right] \\
& + \left( \beta \left( 2 + 2\sqrt{\frac{d}{b_2}} \right) \left( \left( \frac{1}{b_1 N} \left( 1 + \frac{b_1 - 1}{n} \right) + t_0 \right) \eta_t \eta_{t-t_0} + \frac{1}{nN} \eta_t \right) \right) \mathbb{E} \left[ \left\| \nabla f_i \left( w_i^{t_i}; z_{ij}^{t_i} \right) \right\| \right] \\
& + \beta \eta_t \mathbb{E} \left[ \sum_{t'=t_i}^{t-1} \left( \frac{\eta_{t'}}{b_1 N} \sum_{i' \in [N]} \sum_{j' \in [n]} \alpha_{i'j'}^{t'} \left( \frac{\mu \beta}{b_2} \sum_{l=1}^{b_2} \left\| v_{i',l}^{t'} \right\|^3 + 2 \left\| \nabla f_{i'} \left( w_{i'}^{t'}; z_{i'j'}^{t'} \right) \right\| \right. \right. \right. \\
& \left. \left. \left. + \left\| \frac{1}{b_2} \sum_{l=1}^{b_2} \left\langle \nabla f_{i'} \left( w_{i'}^{t'}; z_{i'j'}^{t'} \right) - \nabla f_{i'} \left( \bar{w}_{i'}^{t'}; \bar{z}_{i'j'}^{t'} \right), v_{i',l}^{t'} \right\rangle v_{i',l}^{t'} - \nabla f_{i'} \left( w_{i'}^{t'}; z_{i'j'}^{t'} \right) + \nabla f_{i'} \left( \bar{w}_{i'}^{t'}; \bar{z}_{i'j'}^{t'} \right) \right\| \right) \right] \\
\leq & (1 + 2\beta \eta_t) \mathbb{E} \left[ \left\| w^t - \bar{w}^t \right\| \right] + \left( \mu \beta^2 \left( \frac{1}{b_1 N} \left( 1 + \frac{b_1 - 1}{n} \right) + t_0 \right) \eta_t \eta_{t-t_0} + \mu \beta \eta_t \right) \mathbb{E} \left[ \left\| v_{i,l}^{t_i} \right\|^3 \right] \\
& + \left( \beta \left( 2 + 2\sqrt{\frac{d}{b_2}} \right) \left( \left( \frac{1}{b_1 N} \left( 1 + \frac{b_1 - 1}{n} \right) + t_0 \right) \eta_t \eta_{t-t_0} + \frac{1}{nN} \eta_t \right) \right) \mathbb{E} \left[ \left\| \nabla f_i \left( w_i^{t_i}; z_{ij}^{t_i} \right) \right\| \right] \\
& + \beta t_0 \eta_t \eta_{t-t_0} \left( \mu \beta \mathbb{E} \left[ \left\| v_{i',l}^{t_{i'}} \right\|^3 \right] + \left( 2 + 2\sqrt{\frac{d}{b_2}} \right) \mathbb{E} \left[ \left\| \nabla f_{i'} \left( w_{i'}^{t_{i'}}; z_{i'j'}^{t_{i'}} \right) \right\| \right] \right) \\
= & (1 + 2\beta \eta_t) \mathbb{E} \left[ \left\| w^t - \bar{w}^t \right\| \right] + \left( \mu \beta^2 \left( \frac{1}{b_1 N} \left( 1 + \frac{b_1 - 1}{n} \right) + 2t_0 \right) \eta_t \eta_{t-t_0} + \mu \beta \eta_t \right) \mathbb{E} \left[ \left\| v_{i,l}^{t_i} \right\|^3 \right] \\
& + \left( \beta \left( 2 + 2\sqrt{\frac{d}{b_2}} \right) \left( \left( \frac{1}{b_1 N} \left( 1 + \frac{b_1 - 1}{n} \right) + 2t_0 \right) \eta_t \eta_{t-t_0} + \frac{1}{nN} \eta_t \right) \right) \mathbb{E} \left[ \left\| \nabla f_i \left( w_i^{t_i}; z_{ij}^{t_i} \right) \right\| \right] \\
= & (1 + 2\beta \eta_t) \mathbb{E} \left[ \left\| w^t - \bar{w}^t \right\| \right] + \left( \mu \beta^2 \left( \frac{1}{b_1 N} \left( 1 + \frac{b_1 - 1}{n} \right) + 2t_0 \right) \eta_t \eta_{t-t_0} + \mu \beta \eta_t \right) \frac{d}{d+3} \\
& + \left( \beta \left( 2 + 2\sqrt{\frac{d}{b_2}} \right) \left( \left( \frac{1}{b_1 N} \left( 1 + \frac{b_1 - 1}{n} \right) + 2t_0 \right) \eta_t \eta_{t-t_0} + \frac{1}{nN} \eta_t \right) \right) \mathbb{E} \left[ \left\| \nabla f_i \left( w_i^{t_i}; z_{ij}^{t_i} \right) \right\| \right] \\
\leq & (1 + 2\beta \eta_t) \mathbb{E} \left[ \left\| w^t - \bar{w}^t \right\| \right] + \mu \beta^2 \left( \frac{1}{b_1 N} \left( 1 + \frac{b_1 - 1}{n} \right) + 2t_0 \right) \eta_t \eta_{t-t_0} + \mu \beta \eta_t
\end{aligned}$$



$$+ \left( \beta \left( 2 + 2\sqrt{\frac{d}{b_2}} \right) \left( \left( \frac{1}{b_1 N} \left( 1 + \frac{b_1 - 1}{n} \right) + 2t_0 \right) \eta_t \eta_{t-t_0} + \frac{1}{nN} \eta_t \right) \right) \mathbb{E} [\|\nabla f_i(w_i^{t_i}; z_{ij}^{t_i})\|]. \quad (12)$$

To measure the stability, we need to obtain the upper bound of  $\mathbb{E}[\|\nabla f_i(w_i^{t_i}; z_{ij}^{t_i})\|]$ ,  $i \in [N]$ ,  $j \in [n]$ . Based on Equation (1), the update of asynchronous FedZO, triangular inequality, Lemmas 4, 5 and Assumption 3, we provide that

$$\begin{aligned} & \mathbb{E} [F_S(w^{t+1}) - F_S(w^t)] \\ & \leq \mathbb{E} \left[ \langle w^{t+1} - w^t, \nabla F_S(w^t) \rangle + \frac{1}{2} \beta \|w^{t+1} - w^t\|^2 \right] \\ & = \mathbb{E} \left[ \left\langle -\frac{\eta_t}{b_1 N} \sum_{i \in [N]} \sum_{m \in [b_1]} \tilde{\nabla} f_i(w_i^{t_i}; z_{i,m}^{t_i}), \nabla F_S(w^t) \right\rangle + \frac{1}{2} \beta \left\| \frac{\eta_t}{b_1 N} \sum_{i \in [N]} \sum_{m \in [b_1]} \tilde{\nabla} f_i(w_i^{t_i}; z_{i,m}^{t_i}) \right\|^2 \right] \\ & = -\frac{\eta_t}{b_1 N} \sum_{i \in [N]} \sum_{m \in [b_1]} \mathbb{E} \left[ \left\langle \tilde{\nabla} f_i(w_i^{t_i}; z_{i,m}^{t_i}) - \nabla f_i(w_i^{t_i}; z_{i,m}^{t_i}) + \nabla f_i(w_i^{t_i}; z_{i,m}^{t_i}), \nabla F_S(w^t) \right\rangle \right] \\ & \quad + \frac{\beta}{2} \mathbb{E} \left[ \left\| \frac{\eta_t}{b_1 N} \sum_{i \in [N]} \sum_{m \in [b_1]} \left( \tilde{\nabla} f_i(w_i^{t_i}; z_{i,m}^{t_i}) - \nabla f_i(w_i^{t_i}; z_{i,m}^{t_i}) + \nabla f_i(w_i^{t_i}; z_{i,m}^{t_i}) \right) \right\|^2 \right] \\ & \leq -\frac{\eta_t}{b_1 N} \sum_{i \in [N]} \sum_{m \in [b_1]} \mathbb{E} \left[ \left\langle \tilde{\nabla} f_i(w_i^{t_i}; z_{i,m}^{t_i}) - \nabla f_i(w_i^{t_i}; z_{i,m}^{t_i}), \nabla F_S(w^t) \right\rangle \right] - \eta_t \mathbb{E} [\langle \nabla f_i(w_i^{t_i}; z_{i,m}^{t_i}), \nabla F_S(w^t) \rangle] \\ & \quad + \beta \eta_t^2 \mathbb{E} \left[ \left\| \tilde{\nabla} f_i(w_i^{t_i}; z_{i,m}^{t_i}) - \nabla f_i(w_i^{t_i}; z_{i,m}^{t_i}) \right\|^2 \right] + \beta \eta_t^2 \mathbb{E} [\|\nabla F_S(w_i^{t_i})\|^2] \\ & \leq \frac{\eta_t}{2b_1 N} \sum_{i \in [N]} \sum_{m \in [b_1]} \mathbb{E} \left[ \left\| \tilde{\nabla} f_i(w_i^{t_i}; z_{i,m}^{t_i}) - \nabla f_i(w_i^{t_i}; z_{i,m}^{t_i}) \right\|^2 \right] + \frac{\eta_t}{2} \mathbb{E} [\|\nabla F_S(w^t)\|^2] \\ & \quad - \eta_t \mathbb{E} [\langle \nabla f_i(w_i^{t_i}; z_{i,m}^{t_i}), \nabla F_S(w^t) \rangle] + \beta \eta_t^2 \mathbb{E} \left[ \left\| \tilde{\nabla} f_i(w_i^{t_i}; z_{i,m}^{t_i}) - \nabla f_i(w_i^{t_i}; z_{i,m}^{t_i}) \right\|^2 \right] + \beta \eta_t^2 \mathbb{E} [\|\nabla F_S(w_i^{t_i})\|^2] \\ & \leq \left( \beta \eta_t^2 - \frac{\eta_t}{2} \right) \mathbb{E} [\|\nabla F_S(w_i^{t_i})\|^2] + \left( \frac{\eta_t}{2b_1 N} + \frac{\beta \eta_t^2}{b_1 N} \right) \sum_{i \in [N]} \sum_{m \in [b_1]} \left( \frac{\mu^2 \beta^2}{4} \mathbb{E} [\|v_{i,l}^{t_i}\|^6] \right. \\ & \quad \left. + \frac{d}{b_2} \mathbb{E} [\|\nabla f_i(w_i^{t_i}; z_{i,m}^{t_i})\|^2] \right) \\ & = \left( \left( 1 + \frac{d}{b_2} \right) \beta \eta_t^2 - \left( \frac{1}{2} - \frac{d}{2b_2} \right) \eta_t \right) \mathbb{E} [\|\nabla F_S(w_i^{t_i})\|^2] + \frac{d\mu^2 \beta^3 \eta_t^2}{4(d+6)} + \frac{d\mu^2 \beta^2 \eta_t}{8(d+6)} \\ & \leq -\left( \frac{1}{4} - \frac{d}{4b_2} \right) \eta_t \mathbb{E} [\|\nabla F_S(w_i^{t_i})\|^2] + \frac{\mu^2 \beta^3 \eta_t^2}{4} + \frac{\mu^2 \beta^2 \eta_t}{8} \\ & = -\left( \frac{1}{4} - \frac{d}{4b_2} \right) \mathbb{E} [\|\nabla F_S(w^t)\|^2] + \frac{\mu^2 \beta^3 \eta_t^2}{4} + \frac{\mu^2 \beta^2 \eta_t}{8} \\ & \leq -\left( \frac{1}{2} - \frac{d}{2b_2} \right) \alpha \mathbb{E} [F_S(w^t) - F_S(w(S))] + \frac{\mu^2 \beta^3 \eta_t^2}{4} + \frac{\mu^2 \beta^2 \eta_t}{8}. \quad (13) \end{aligned}$$

Then,

$$\begin{aligned} & \mathbb{E} [F_S(w^{t+1}) - F_S(w(S))] \\ & \leq \left( 1 - \left( \frac{1}{2} - \frac{d}{2b_2} \right) \alpha \right) \mathbb{E} [F_S(w^t) - F_S(w(S))] + \frac{\mu^2 \beta^3 \eta_t^2}{4} + \frac{\mu^2 \beta^2 \eta_t}{8} \\ & \leq \mathbb{E} [F_S(w^t) - F_S(w(S))] + \frac{\mu^2 \beta^3 \eta_t^2}{4} + \frac{\mu^2 \beta^2 \eta_t}{8} \\ & \leq \mathbb{E} [F_S(w^1) - F_S(w(S))] + \sum_{i=1}^t \left( \frac{\mu^2 \beta^3}{4} \eta_i^2 + \frac{\mu^2 \beta^2}{8} \eta_i \right) \end{aligned}$$

$$\leq \mathbb{E} [F_S(w^1) - F_S(w(S))] + \frac{\mu^2 \beta^3 \eta_1^2}{2} + \frac{\mu^2 \beta^2 \eta_1}{8} \log(et),$$

where the last inequality is due to Lemma 3 (a), (b). It follows from Lemma 1 (2) that

$$\begin{aligned} & \mathbb{E} [\|\nabla f_i(w_i^{t_i}; z_{ij}^{t_i})\|^2] \\ & \leq 2\beta \mathbb{E} [F_{S_i}(w_i^{t_i})] = \frac{2\beta}{N} \sum_{i=1}^N \mathbb{E} [F_{S_i}(w_i^{t_i})] = 2\beta \mathbb{E} [F_S(w^t)] \\ & \leq 2\beta \left( \mathbb{E} [F_S(w^1)] + \frac{\mu^2 \beta^3 \eta_1^2}{2} + \frac{\mu^2 \beta^2 \eta_1}{8} \log(e(t-1)) \right). \end{aligned}$$

For convenience, we denote  $2\beta \left( \mathbb{E} [F_S(w^1)] + \frac{\mu^2 \beta^3 \eta_1^2}{2} + \frac{\mu^2 \beta^2 \eta_1}{8} \log(e(t-1)) \right)$  as  $\hat{\tau}(t)$ . Then, from Equation (12), we know that

$$\begin{aligned} & \mathbb{E} [\|w^{t+1} - \bar{w}^{t+1}\|] \\ & \leq (1 + 2\beta\eta_t) \mathbb{E} [\|w^t - \bar{w}^t\|] + \left( \mu\beta + \frac{4\sqrt{\hat{\tau}(t)}}{nN} \sqrt{\frac{d}{b_2}} \right) \eta_t + \left( \mu\beta^2 \left( \frac{1}{b_1 N} \left( 1 + \frac{b_1 - 1}{n} \right) + 2t_0 \right) \right. \\ & \quad \left. + \beta \left( 2 + 2\sqrt{\frac{d}{b_2}} \right) \left( \frac{1}{b_1 N} \left( 1 + \frac{b_1 - 1}{n} \right) + 2t_0 \right) \sqrt{\hat{\tau}(t)} \right) \eta_{t-t_0}^2. \end{aligned}$$

Let  $a_5(t) = \mu\beta + \frac{4\sqrt{\hat{\tau}(t)}}{nN} \sqrt{\frac{d}{b_2}}$  and  $a_6(t) = \mu\beta^2 \left( \frac{1}{b_1 N} \left( 1 + \frac{b_1 - 1}{n} \right) + 2t_0 \right) + \beta \left( 2 + 2\sqrt{\frac{d}{b_2}} \right) \left( \frac{1}{b_1 N} \left( 1 + \frac{b_1 - 1}{n} \right) + 2t_0 \right) \sqrt{\hat{\tau}(t)}$ . Taking summation from  $t = 1$  to  $T - 1$ , we deduce that

$$\begin{aligned} & \mathbb{E} [\|w^T - \bar{w}^T\|] \\ & \leq \sum_{t=1}^{T-1} \left( \prod_{s=t+1}^{T-1} (1 + 2\beta\eta_s) \right) (a_5(t)\eta_t + a_6(t)\eta_{t-t_0}^2) \\ & \leq \exp \left( 2\beta\eta_1 \sum_{s=1}^{T-1} s^{-1} \right) \left( a_5(T-1)\eta_1 \sum_{t=1}^{T-1} t^{-1} + a_6(T-1)\eta_1^2 \sum_{t=1}^{T-1} (t-t_0)^{-2} \right) \\ & \leq (e(T-1))^{2\beta\eta_1} (a_5(T-1)\eta_1 \log(e(T-1)) + 4a_6(T-1)\eta_1^2) \\ & \leq \mathcal{O} \left( \mu T^{\frac{1}{2}} \left( (nN)^{-1} (\log T)^{\frac{3}{2}} + \log T + t_0 \sqrt{\log T} \right) \right). \end{aligned}$$

□

**Proof of Corollary 3:** We integrate Theorem 1 (b) and Theorem 5 to obtain that

$$\begin{aligned} & |\mathbb{E} [F(w^T) - F_S(w^T)]| \\ & \leq \frac{(4\theta)^\theta K}{nN} \sum_{i=1}^N \sum_{j=1}^n \mathbb{E} [\|w^T - \bar{w}^T\|] + 2\mathbb{E} [F_S(w^T)] \\ & = (4\theta)^\theta K \mathbb{E} [\|w^T - \bar{w}^T\|] + 2\mathbb{E} [F_S(w^T)] \\ & \leq \mathcal{O} \left( \left( \left( 1 + (nN)^{-1} \sqrt{\log T} \right) \log T + \sqrt{\log T} t_0 \right) (4\theta)^\theta \mu T^{\frac{1}{2}} + \mathbb{E} [F_S(w^T)] \right). \end{aligned}$$

The proof is complete. □

**Proof of Theorem 6:** According to Equation (13),

$$\begin{aligned} & \mathbb{E} [F_S(w^{t+1}) - F_S(w^t)] \\ & \leq - \left( \frac{1}{2} - \frac{d}{2b_2} \right) \alpha \eta_t \mathbb{E} [F_S(w^t) - F_S(w(S))] + \frac{\mu^2 \beta^3 \eta_t^2}{4} + \frac{\mu^2 \beta^2 \eta_t}{8}, \end{aligned}$$

that is

$$\mathbb{E} [F_S(w^{t+1}) - F(w(S))]$$

$$\begin{aligned}
&\leq \left(1 - \left(\frac{1}{2} - \frac{d}{2b_2}\right) \alpha \eta_t\right) \mathbb{E} [F_S(w^t) - F(w(S))] + \frac{\mu^2 \beta^3 \eta_t^2}{4} + \frac{\mu^2 \beta^2 \eta_t}{8} \\
&= \left(1 - \left(\frac{1}{2} - \frac{d}{2b_2}\right) \frac{\alpha \eta_1}{t}\right) \mathbb{E} [F_S(w^t) - F(w(S))] + \frac{\mu^2 \beta^3 \eta_1^2}{4} t^{-2} + \frac{\mu^2 \beta^2 \eta_1}{8} t^{-1}.
\end{aligned}$$

We multiply both sides of the above inequality by  $t \left(t - \left(\frac{1}{4} - \frac{d}{4b_2}\right) \alpha \eta_1\right)$  to get

$$\begin{aligned}
&t \left(t - \left(\frac{1}{4} - \frac{d}{4b_2}\right) \alpha \eta_1\right) \mathbb{E} [F_S(w^{t+1}) - F(w(S))] \\
&\leq \left(t - \left(\frac{1}{4} - \frac{d}{4b_2}\right) \alpha \eta_1\right) \left(t - \left(\frac{1}{2} - \frac{d}{2b_2}\right) \alpha \eta_1\right) \mathbb{E} [F_S(w^t) - F(w(S))] \\
&\quad + \frac{\mu^2 \beta^3 \eta_1^2}{4} + \frac{\mu^2 \beta^2 \eta_1}{8} t \\
&\leq \left(1 - \left(\frac{1}{4} - \frac{d}{4b_2}\right) \alpha \eta_1\right) \left(1 - \left(\frac{1}{2} - \frac{d}{2b_2}\right) \alpha \eta_1\right) \mathbb{E} [F_S(w^1) - F(w(S))] \\
&\quad + \frac{\mu^2 \beta^3 \eta_1^2 t}{4} + \frac{\mu^2 \beta^2 \eta_1}{8} \sum_{t'=1}^t t' \\
&\leq \left(1 - \left(\frac{1}{4} - \frac{d}{4b_2}\right) \alpha \eta_1\right) \left(1 - \left(\frac{1}{2} - \frac{d}{2b_2}\right) \alpha \eta_1\right) \mathbb{E} [F_S(w^1) - F(w(S))] \\
&\quad + \frac{\mu^2 \beta^3 \eta_1^2 t}{4} + \frac{\mu^2 \beta^2 \eta_1}{16} t(t+1).
\end{aligned}$$

Therefore,

$$\begin{aligned}
&\mathbb{E} [F_S(w^T) - F_S(w(S))] \\
&\leq \frac{\left(1 - \left(\frac{1}{4} - \frac{d}{4b_2}\right) \alpha \eta_1\right) \left(1 - \left(\frac{1}{2} - \frac{d}{2b_2}\right) \alpha \eta_1\right)}{(T-1) \left(T-1 - \left(\frac{1}{4} - \frac{d}{4b_2}\right) \alpha \eta_1\right)} \mathbb{E} [F_S(w^1) - F(w(S))] \\
&\quad + \frac{\mu^2 \beta^3 \eta_1^2}{4 \left(T-1 - \left(\frac{1}{4} - \frac{d}{4b_2}\right) \alpha \eta_1\right)} + \frac{\mu^2 \beta^2 \eta_1 T}{16 \left(T-1 - \left(\frac{1}{4} - \frac{d}{4b_2}\right) \alpha \eta_1\right)} \\
&= \mathcal{O}(T^{-2} + \mu^2).
\end{aligned}$$

The optimization bound is given. By integrating this optimization upper bound and the generalization upper bound in Corollary 3, we can get the following expected excess risk bound

$$\begin{aligned}
&|\mathbb{E} [F(w^T) - F(w^*)]| \\
&\leq |\mathbb{E} [F(w^T) - F_S(w^T)]| + |\mathbb{E} [F_S(w^T) - F_S(w(S))]| \\
&\leq \mathcal{O}\left(T^{-2} + \mu^2 + \left((1 + (nN)^{-1} \sqrt{\log T}) \log T + \sqrt{\log T t_0}\right) (4\theta)^\theta \mu T^{\frac{1}{2}} + \mathbb{E}[F_S(w^T)]\right).
\end{aligned}$$

□

## References

- [1] Liam Madden, Emiliano Dall’Anese, and Stephen Becker. High-probability convergence bounds for non-convex stochastic gradient descent, 2020.
- [2] Shaojie Li and Yong Liu. High probability guarantees for nonconvex stochastic gradient descent with heavy tails. In *International Conference on Machine Learning (ICML)*, volume 162, pages 12931–12963, 2022.
- [3] John C. Duchi, Michael I. Jordan, Martin J. Wainwright, and Andre Wibisono. Optimal rates for zero-order convex optimization: The power of two function evaluations. *IEEE Transactions on Information Theory*, 61(5):2788–2806, 2015.
